# Supplementary material for: Optimizing the lifetimes of phenoxonium cations derived from vitamin E via structural modifications
Source: Royal Society of Chemistry journal article supplement (doi:10.1039/c5ob01868d), 2015-01-01
Supplement: c5ob01868d1.pdf [file c5ob01868d1.pdf]

## Supplementary Information Section:

# Optimizing the Lifetimes of Phenoxonium Cations Derived from Vitamin E *via* Structural Modifications

*Yanni Yue, Maria L. Novianti, Malcolm E. Tessensohn, Hajime Hirao and Richard D. Webster\**

<sup>1</sup>Division of Chemistry and Biological Chemistry, School of Physical and Mathematical Sciences,  
Nanyang Technological University, Singapore 637371.

\*E-mail: [webster@ntu.edu.sg](mailto:webster@ntu.edu.sg); Telephone: +65 6316 8793; Fax: +65 6791 1961

---

### CONTENTS

|              |                                                                                             |
|--------------|---------------------------------------------------------------------------------------------|
| Page S3      | 1. Synthesis of Modified Forms of Vitamin E                                                 |
|              | 1.1. Experimental Section                                                                   |
|              | 1.2. Compound Characterization and Synthetic Steps                                          |
|              | Arylation of 2,6-dimethylcyclohexa-2,5-diene-1,4-dione.                                     |
| Page S4-S5   | Data for <b>3,5-dimethyl-2-phenylcyclohexa-2,5-diene-1,4-dione</b>                          |
| Page S6-S7   | Data for <b>2-cyclohexyl-3,5-dimethylcyclohexa-2,5-diene-1,4-dione</b>                      |
| Page S8-S9   | Data for <b>3,5-dimethyl-2-(propan-2-yl)cyclohexa-2,5-diene-1,4-dione</b>                   |
| Page S10-S11 | Data for <b>2-(2,2-dimethylpropyl)-3,5-dimethylcyclohexa-2,5-diene-1,4-dione</b>            |
| Page S12-S13 | Data for <b>2-(butan-2-yl)-3,5-dimethylcyclohexa-2,5-diene-1,4-dione</b>                    |
| Page S14-S15 | Data for <b>3,5-dimethyl-2-(2,4,6-trimethylphenyl)cyclohexa-2,5-diene-1,4-dione</b>         |
| Page S16     | General procedure to synthesize hydroquinones from benzoquinones                            |
|              | General procedure to synthesize different substituted 3,4-dihydro-2H-1-benzopyran-6-ol      |
| Page S16-S17 | Data for <b>8-(2,2-dimethylpropyl)-2,2,5,7-tetramethyl-3,4-dihydro-2H-1-benzopyran-6-ol</b> |
| Page S18-S19 | Data for <b>2,2,5,7-tetramethyl-8-phenyl-3,4-dihydro-2H-1-benzopyran-6-ol</b>               |
| Page S20-S21 | Data for <b>8-(butan-2-yl)-2,2,5,7-tetramethyl-3,4-dihydro-2H-1-benzopyran-6-ol</b>         |
| Page S22-S23 | Data for <b>2,2,5,7-tetramethyl-8-(propan-2-yl)-3,4-dihydro-2H-1-benzopyran-6-ol</b>        |

|              |                                                                                                                  |
|--------------|------------------------------------------------------------------------------------------------------------------|
| Page S24-S25 | Data for <b>2,2,5,7-tetramethyl-8-(2,4,6-trimethylphenyl)-3,4-dihydro-2H-1-benzopyran-6-ol</b>                   |
| Page S26-S27 | Data for <b>8-cyclohexyl-2-methoxy-2,5,7-trimethyl-3,4-dihydro-2H-1-benzopyran-6-ol</b>                          |
| Page S28-S29 | Data for <b>2,5,7,8-tetramethyl-2-phenyl-3,4-dihydro-2H-1-benzopyran-6-ol</b>                                    |
| Page S30-S31 | Data for <b>8-cyclohexyl-2,2,5,7-tetramethyl-3,4-dihydro-2H-1-benzopyran-6-ol</b>                                |
| Page S32     | <b>Figure S1.</b> CVs of 2,4,6-trimethylphenyl derivative in CH <sub>3</sub> CN with H <sub>2</sub> O.           |
| Page S33     | <b>Figure S2.</b> CVs of phenyl derivative in CH <sub>3</sub> CN with H <sub>2</sub> O.                          |
| Page S34     | <b>Figure S3.</b> CVs of cyclohexyl derivative in CH <sub>3</sub> CN with H <sub>2</sub> O.                      |
| Page S35     | <b>Figure S4.</b> CVs of <i>sec</i> -butyl derivative in CH <sub>3</sub> CN with H <sub>2</sub> O.               |
| Page S36     | <b>Figure S5.</b> CVs of isopropyl derivative in CH <sub>3</sub> CN with H <sub>2</sub> O.                       |
| Page S37     | 3. Computational Studies                                                                                         |
| Page S37     | <b>Figure S6.</b> Numbering system for atoms in density functional theory calculations.                          |
|              | <b>Figure S7.</b> Density functional theory B3LYP/6-311+G(2df,p) optimized structures of the diamagnetic cations |
| Page S38     | <b>Table S1.</b> Calculated bond lengths and energies (B3LYP/6-311+G(2df,p)).                                    |
| Page S39     | <b>Table S2.</b> Calculated Mulliken (default) charge (B3LYP/6-31G(d)).                                          |
| Page S40     | <b>Table S3.</b> Calculated NBO charges (B3LYP/6-31G(d)).                                                        |
| Page S41     | 4. Additional References                                                                                         |

## 1. Synthesis of Modified Forms of Vitamin E

### 1.1. Experimental Section

NMR spectra were recorded on Bruker AVANCE 400 NMR instrument and were calibrated using residual non deuterated solvent as an internal reference ( $\text{CHCl}_3$  @ 7.26 ppm  $^1\text{H}$ -NMR, 77.0 ppm  $^{13}\text{C}$ -NMR). The following abbreviations were used to explain the multiplicities: s = singlet, brs = broad singlet, d = doublet, t = triplet, dd = doublet of doublets, m = multiplet. Melting points were uncorrected. High-resolution mass spectra (HRMS) were obtained with JEOL MS-700P mass spectrometer, Finnigan MAT 95 XP mass spectrometer (Thermo Electron Corporation), and Q-Tof Premier. Flash column chromatography was performed using Merck silica gel 60 with distilled hexane, and preparative thin-layer chromatography (PTLC) was bought from CEMS MARKETING PTE LTD, PTLC plate (20 cm  $\times$  20 cm) was coated with 10  $\mu\text{m}$ , 60 Å particles, 500  $\mu\text{m}$  coating thickness.

### 1.2. Compound Characterization and Synthetic Steps

#### Arylation of 2,6-dimethylcyclohexa-2,5-diene-1,4-dione.<sup>S1</sup>

To a solution of 2,6-dimethylcyclohexa-2,5-diene-1,4-dione (4.0 mmol) in trifluorotoluene (20 ml) was added the corresponding boronic acid (6.0 mmol), water (20 ml), silver nitrate (0.8 mmol), and potassium persulfate (12.0 mmol). The solution was then stirred vigorously at room temperature and monitored by thin-layer chromatography of the organic layer. Upon consumption of quinone (6–24 h), the reaction was diluted with dichloromethane (48 ml) and washed with 5% sodium bicarbonate. The layers were separated, and the aqueous layer was extracted with dichloromethane (3 $\times$ 64 ml), dried over  $\text{MgSO}_4$ , and evaporated *in vacuo*. Purification was performed by silica gel chromatography to give the arylation product in 60–85% yield. (The reaction needed 48 hours to complete because trimethylphenyl boronic acid is a very bulky acid).

**3,5-dimethyl-2-phenylcyclohexa-2,5-diene-1,4-dione**

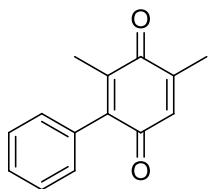

79%; Yellow solid;  $^1\text{H}$  NMR (400 MHz,  $\text{CDCl}_3$ )  $\delta$ : 1.97 (s, 6H), 2.11 (d, 3H,  $J = 1.6$  Hz), 6.66 (d, 1H,  $J = 1.6$  Hz), 7.13–7.16 (m, 2H), 7.39–7.45 (m, 3H);  $^{13}\text{C}$  NMR (100 MHz,  $\text{CDCl}_3$ )  $\delta$ : 14.0, 15.9, 128.1, 128.5, 129.5, 132.9, 133.2, 141.6, 143.7, 145.5, 186.7, 188.6; m.p. 66–69 °C (EtOAc); ESI-HRMS:  $m/z$  calcd for  $\text{C}_{14}\text{H}_{23}\text{O}_2$   $[\text{M}+\text{H}]^+$ : 223.1698; found: 223.1691.

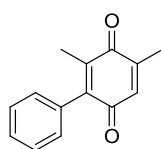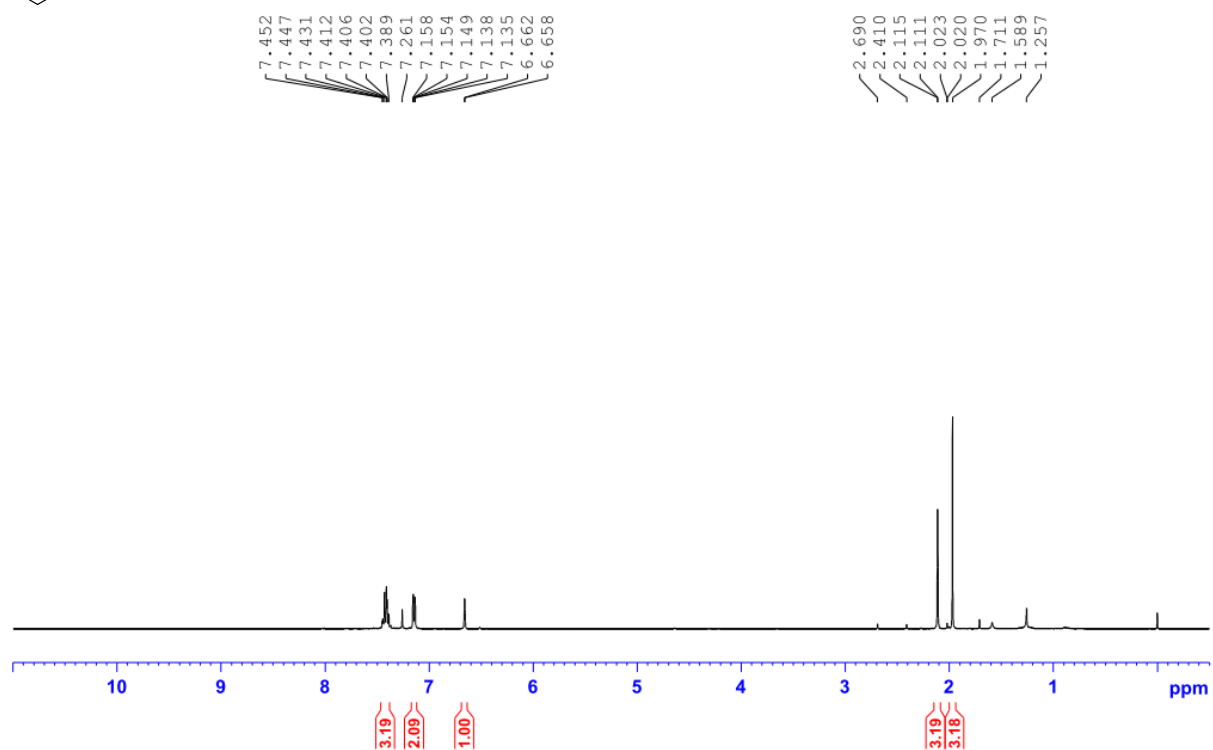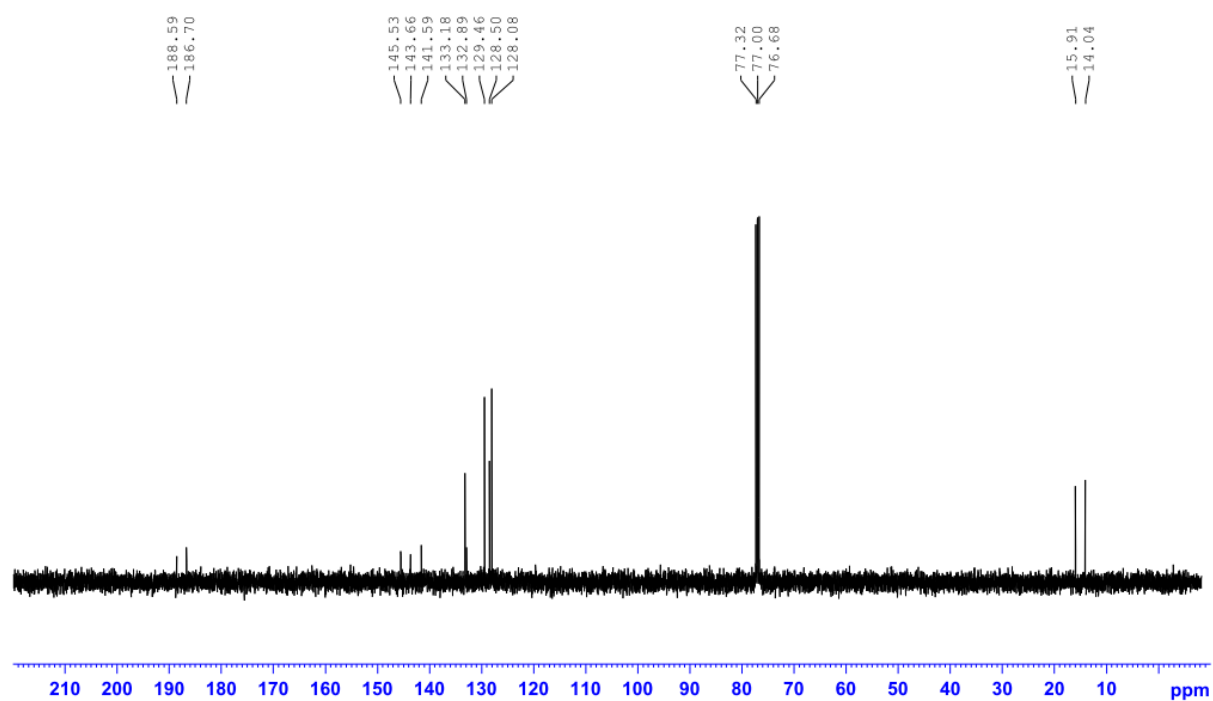

**2-cyclohexyl-3,5-dimethylcyclohexa-2,5-diene-1,4-dione**

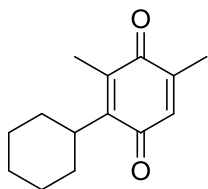

75%; Yellow liquid;  $^1\text{H}$  NMR (400 MHz,  $\text{CDCl}_3$ )  $\delta$ : 1.28–1.30 (m, 3H), 1.50–1.54 (m, 2H), 1.69–1.71 (m, 1H), 1.78–1.86 (m, 2H), 1.88–1.95 (m, 2H), 1.99 (d, 3H,  $J = 1.6$  Hz), 2.07 (s, 3H), 2.67–2.75 (m, 1H), 6.44 (d, 1H,  $J = 1.6$  Hz);  $^{13}\text{C}$  NMR (100 MHz,  $\text{CDCl}_3$ )  $\delta$ : 12.1, 15.6, 25.8, 26.9, 29.9, 39.9, 134.0, 140.4, 144.3, 147.7, 187.8, 188.6; ESI-HRMS:  $m/z$  calcd for  $\text{C}_{14}\text{H}_{19}\text{O}_2$   $[\text{M}+\text{H}]^+$ : 219.1385; found: 219.1385.

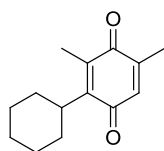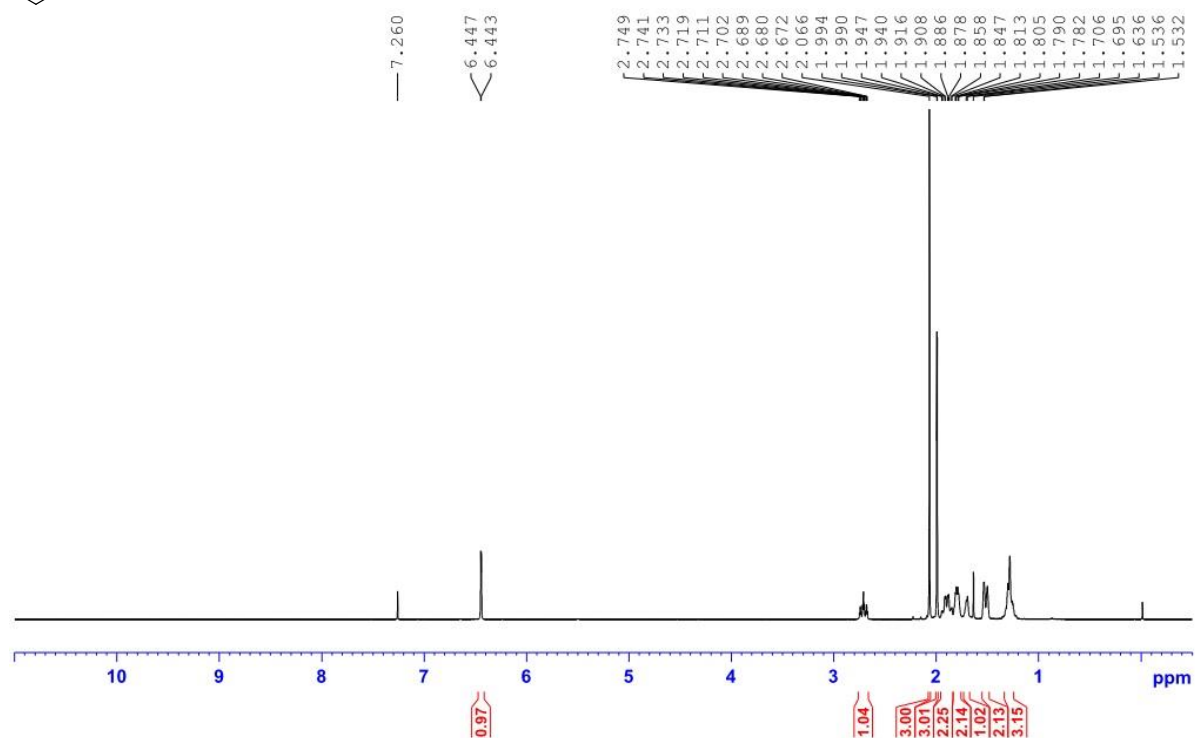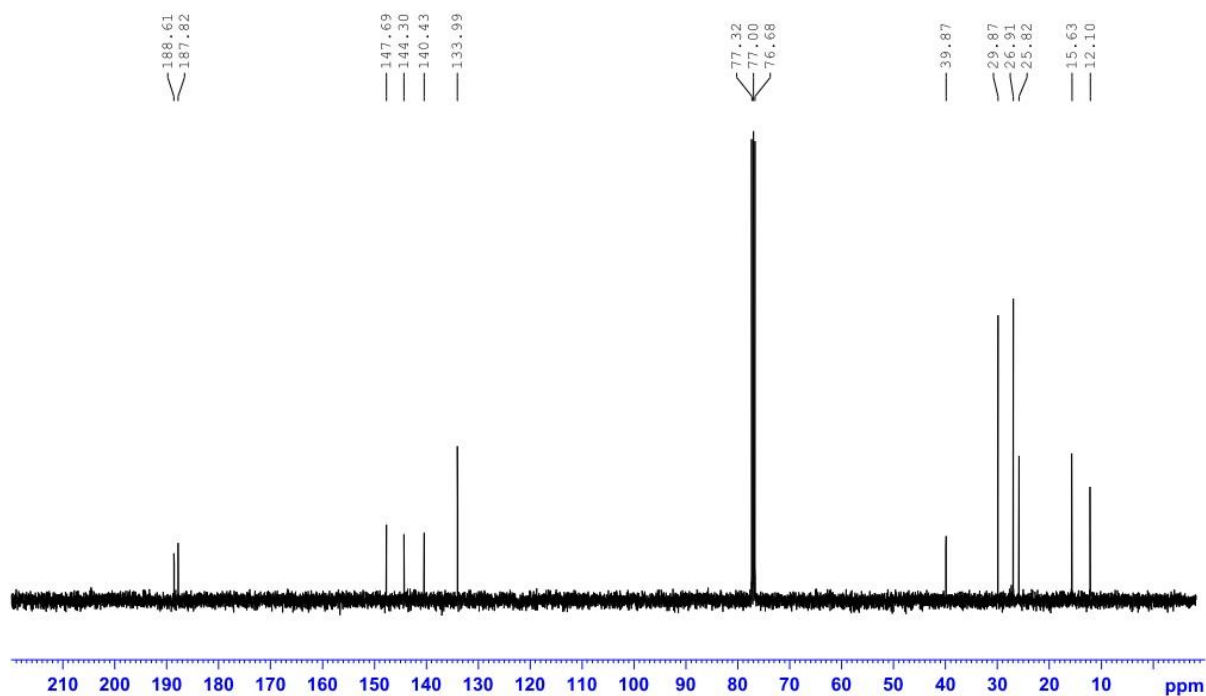

**3,5-dimethyl-2-(propan-2-yl)cyclohexa-2,5-diene-1,4-dione**

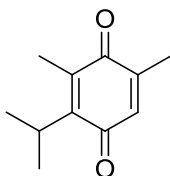

85%; Yellow liquid;  $^1\text{H}$  NMR (400 MHz,  $\text{CDCl}_3$ )  $\delta$ : 1.25 (s, 3H), 1.27 (s, 3H), 2.00 (s, 3H), 2.06 (s, 3H), 3.07–3.14 (m, 1H), 6.46 (s, 1H);  $^{13}\text{C}$  NMR (100 MHz,  $\text{CDCl}_3$ )  $\delta$ : 11.9, 15.7, 20.4, 28.6, 134.0, 140.1, 144.4, 148.6, 187.6, 188.6; ESI-HRMS:  $m/z$  calcd for  $\text{C}_{11}\text{H}_{15}\text{O}_2$   $[\text{M}+\text{H}]^+$ : 179.1072; found: 179.1073.



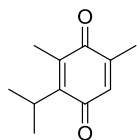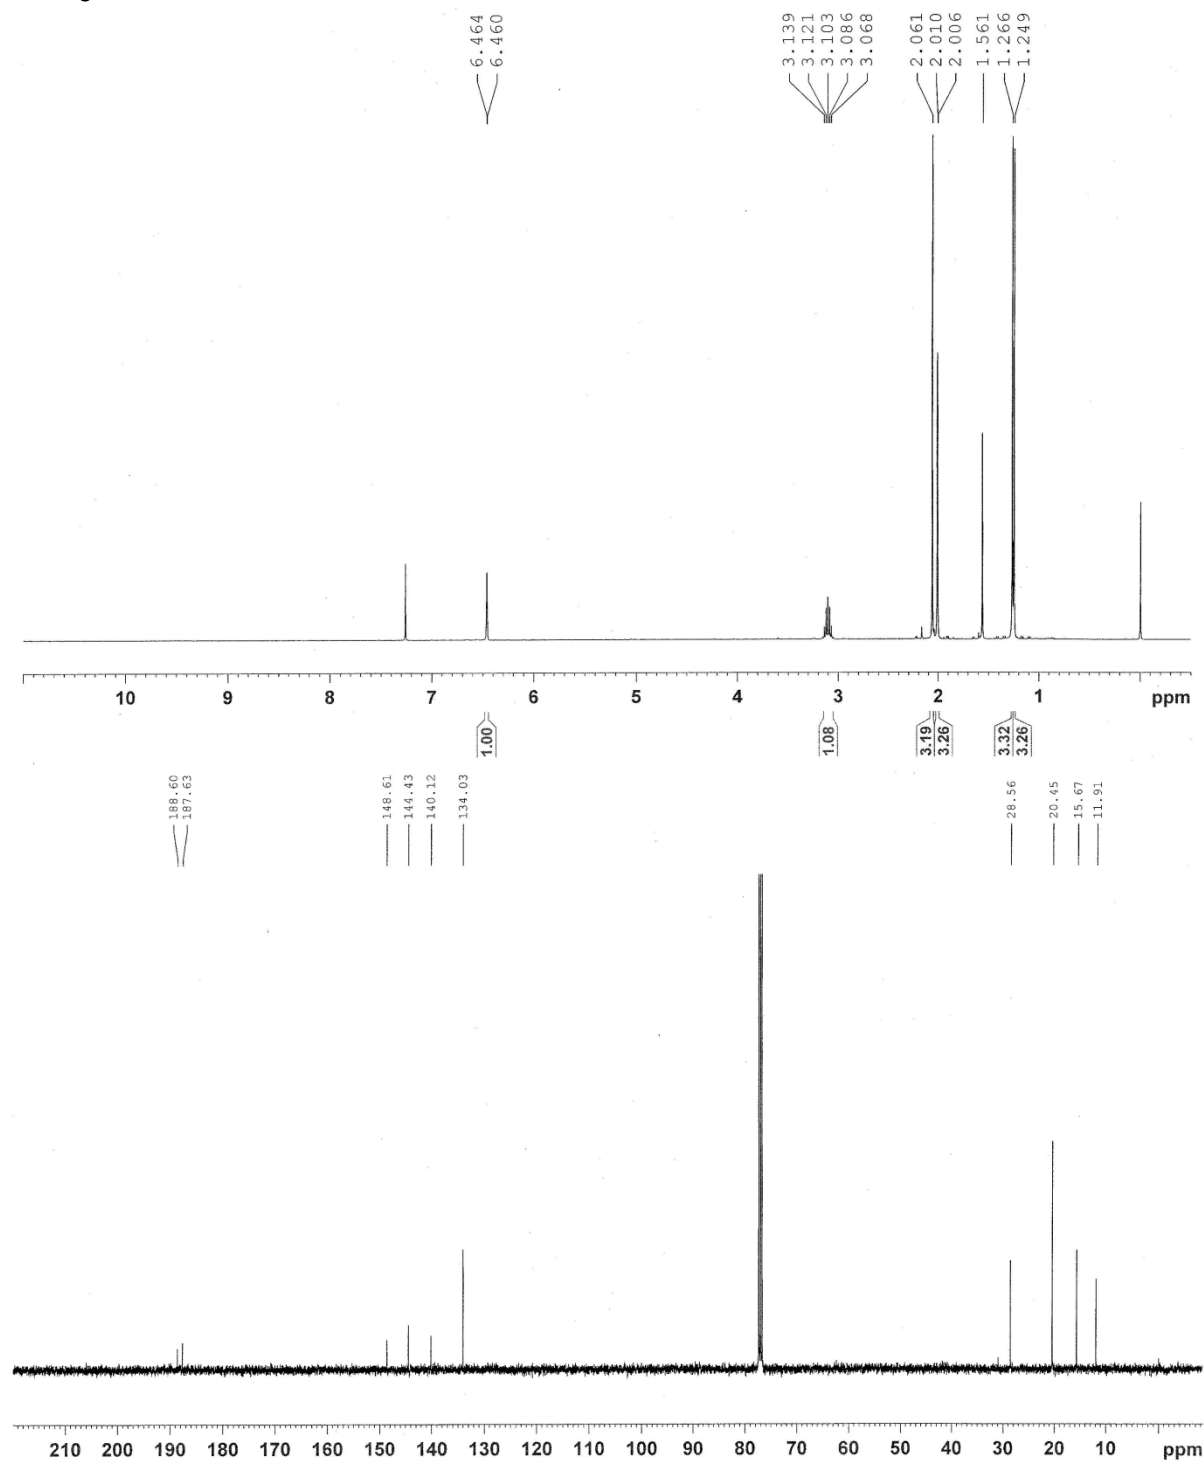

**2-(2,2-dimethyl propyl)-3,5-dimethylcyclohexa-2,5-diene-1,4-dione**

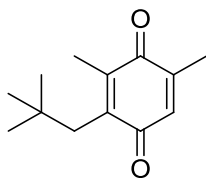

82%; Yellow solid;  $^1\text{H}$  NMR (400 MHz,  $\text{CDCl}_3$ )  $\delta$ : 0.89 (s, 9H), 2.03(s, 3H), 2.04 (s, 3H), 2.49 (s, 2H), 6.55 (s, 1H);  $^{13}\text{C}$  NMR (100 MHz,  $\text{CDCl}_3$ )  $\delta$ : 14.2, 15.8, 30.4, 34.2, 38.2, 133.4, 142.5, 143.5, 145.0, 187.8, 188.3; m.p. 54–56 °C (EtOAc); ESI-HRMS:  $m/z$  calcd for  $\text{C}_{13}\text{H}_{19}\text{O}_2$   $[\text{M}+\text{H}]^+$ : 207.1385; found: 207.1382.

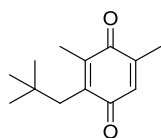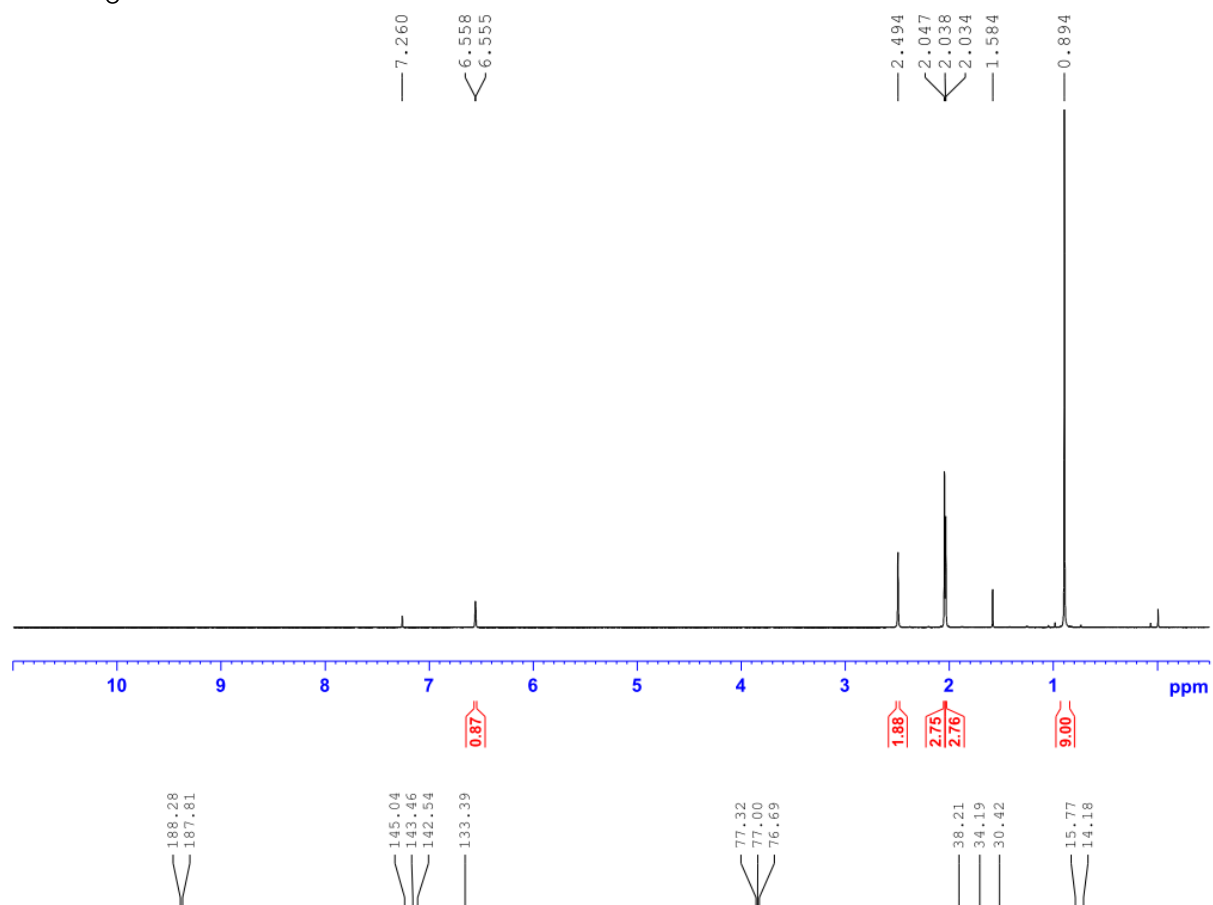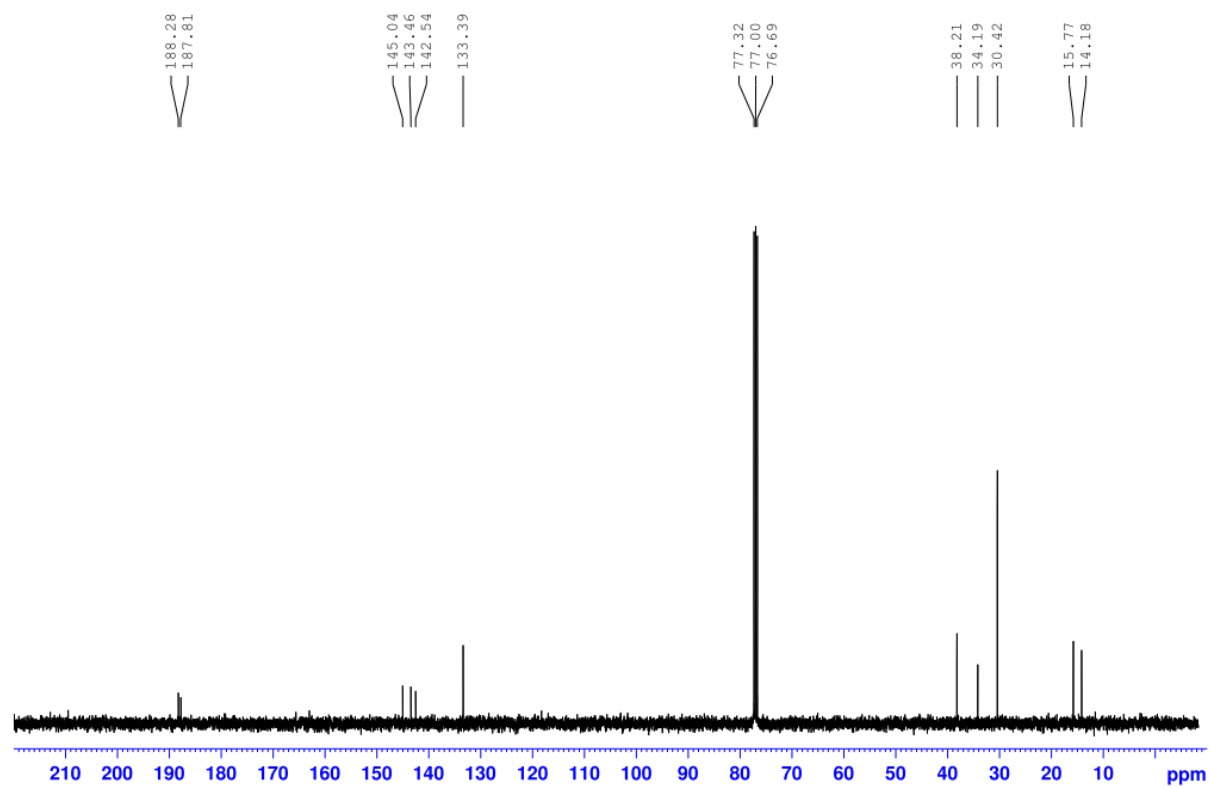

**2-(butan-2-yl)-3,5-dimethylcyclohexa-2,5-diene-1,4-dione**

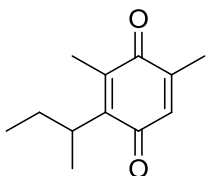

82%; Yellow liquid;  $^1\text{H}$  NMR (400 MHz,  $\text{CDCl}_3$ )  $\delta$ : 0.82 (t, 3H,  $J = 7.6$  Hz), 1.23 (d, 3H,  $J = 7.2$  Hz), 1.61–1.68 (m, 1H), 1.73–1.80 (m, 1H), 2.01 (d, 3H,  $J = 0.8$  Hz), 2.05(s, 3H), 2.82–2.88 (m, 1H), 6.46 (d, 1H,  $J = 1.2$  Hz);  $^{13}\text{C}$  NMR (100 MHz,  $\text{CDCl}_3$ )  $\delta$ : 12.1, 12.8, 15.7, 18.6, 27.9, 36.1, 134.0, 141.1, 144.5, 147.7, 187.7, 188.4; ESI-HRMS:  $m/z$  calcd for  $\text{C}_{12}\text{H}_{17}\text{O}_2$   $[\text{M}+\text{H}]^+$ : 193.1229; found: 193.1229.

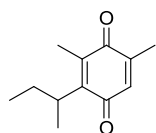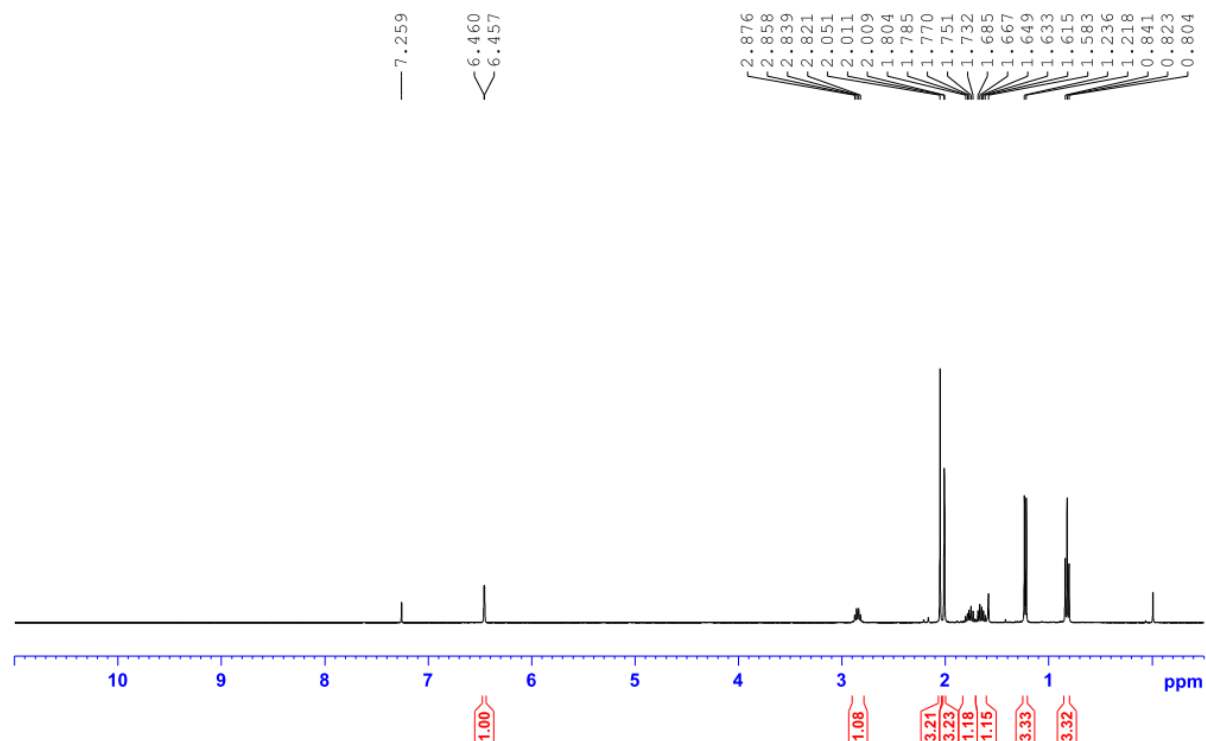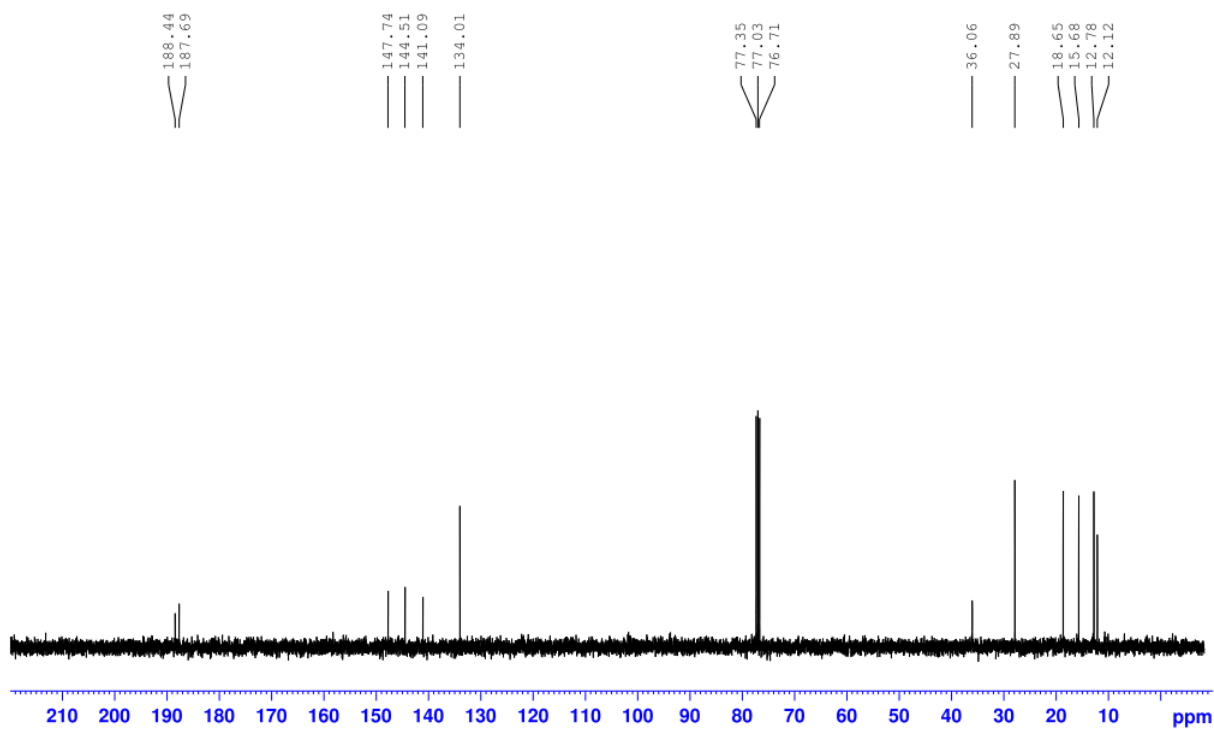

**3,5-dimethyl-2-(2,4,6-trimethylphenyl)cyclohexa-2,5-diene-1,4-dione**

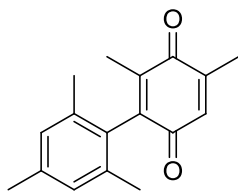

60%; Yellow solid;  $^1\text{H}$  NMR (400 MHz,  $\text{CDCl}_3$ )  $\delta$ : 1.78 (s, 3H), 2.00 (s, 6H), 2.12 (s, 3H), 2.31 (s, 3H), 6.67 (s, 1H), 6.92 (s, 2H);  $^{13}\text{C}$  NMR (100 MHz,  $\text{CDCl}_3$ )  $\delta$ : 13.1, 15.9, 19.7, 21.1, 128.2, 129.7, 133.4, 135.0, 137.9, 142.8, 144.1, 145.6, 186.4, 188.2; m.p. 58–60 °C (EtOAc); ESI-HRMS:  $m/z$  calcd for  $\text{C}_{17}\text{H}_{19}\text{O}_2$   $[\text{M}+\text{H}]^+$ : 255.1385; found: 255.1382.

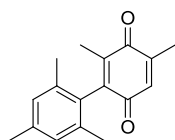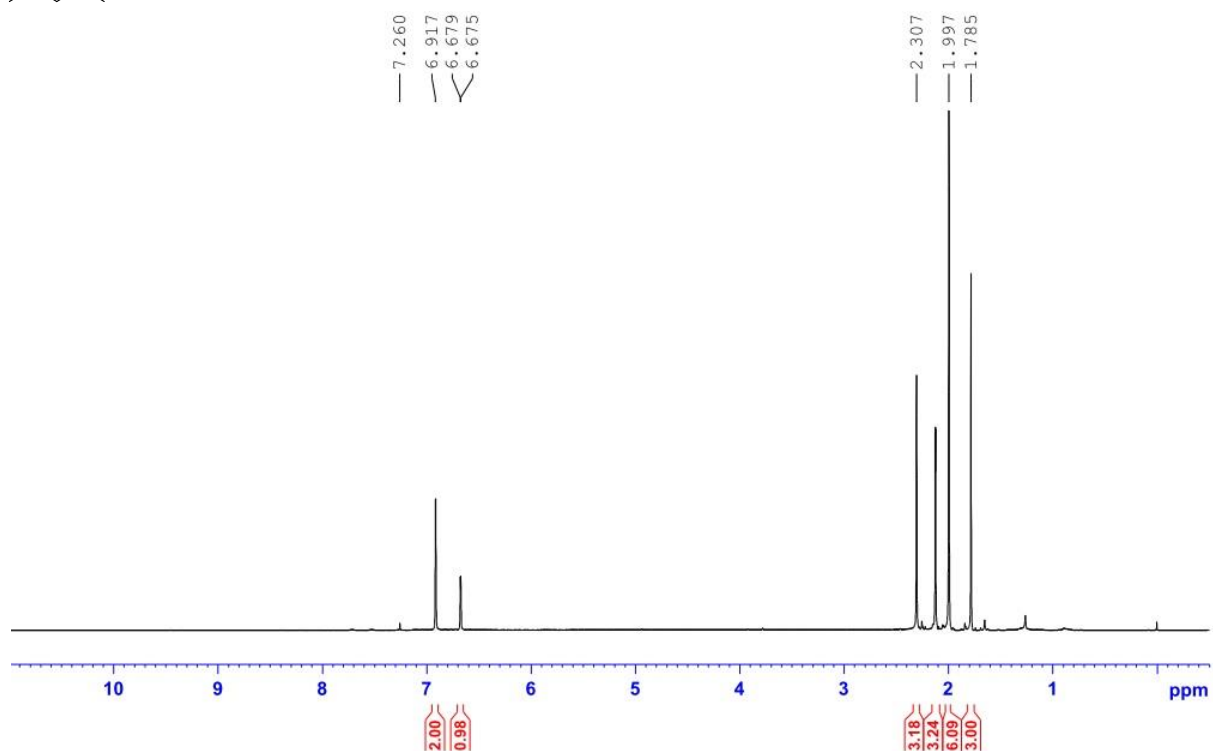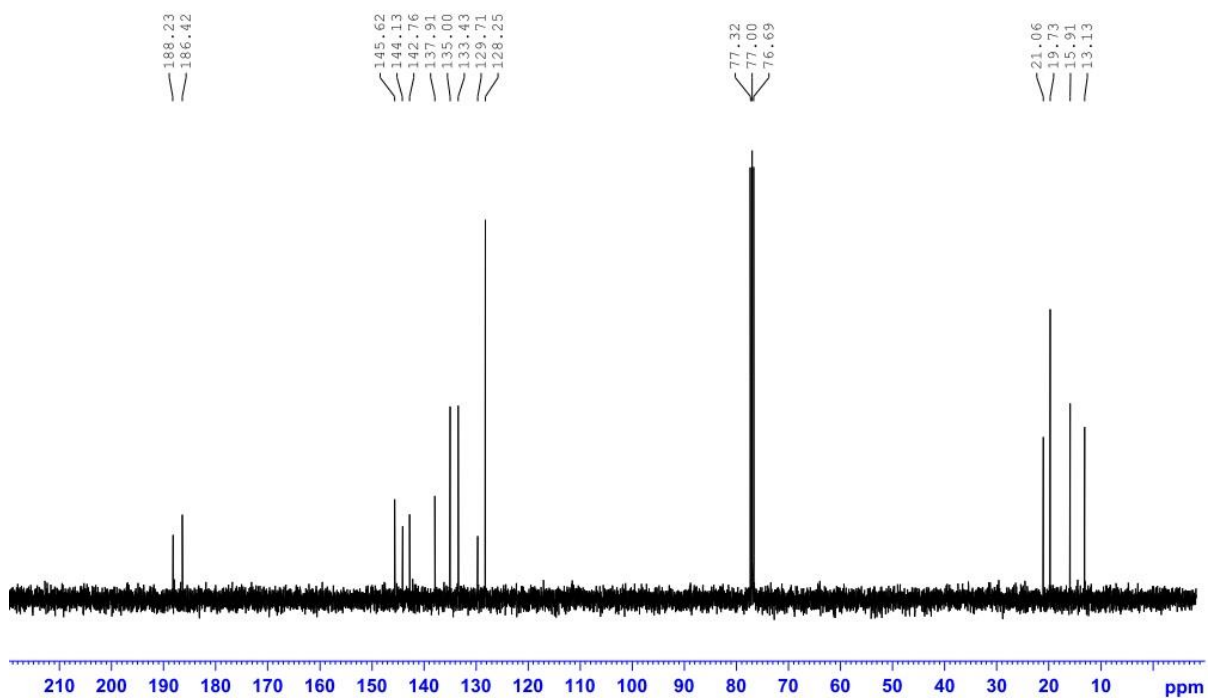

### General procedure to synthesize hydroquinones from benzoquinones<sup>S2</sup>

To a solution of benzoquinone (2.2 mmol) in acetic acid (6.0 ml), zinc powder (4 eq, 589 mg) was added. The mixture was then sonicated for 30 minutes. Upon consumption of quinone, the reaction mixture was filtered and the residue was washed with ethyl acetate. The combined filtrates were concentrated *in vacuo*, affording the pure reduction product in quantitative yield.

### General procedure to synthesize different substituted 3,4-dihydro-2H-1-benzopyran-6-ol<sup>S3</sup>

A solution of hydroquinone and 2-methylbut-3-en-2-ol in 1:1 mole ratio in minimum amount of trifluoroacetic acid was stirred at room temperature under inert atmosphere, and completion of reaction was monitored by thin-layer chromatography. The solvent was removed under reduced pressure, and the residue was dissolved in hexane. The organic layer was neutralized with saturated sodium bicarbonate, then washed with saturated sodium chloride, dried over anhydrous NaSO<sub>4</sub>, and concentrated *in vacuo*. Purification was performed by silica gel chromatography to yield pure product in (56–72%).

#### 8-(2,2-dimethylpropyl)-2,2,5,7-tetramethyl-3,4-dihydro-2H-1-benzopyran-6-ol

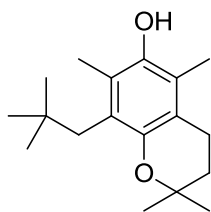

68%; White solid; <sup>1</sup>H NMR (400MHz, CDCl<sub>3</sub>) δ: 0.93 (s, 9H), 1.28 (s, 6H), 1.74 (t, 2H, *J* = 6.8 Hz), 2.13 (s, 3H), 2.19 (s, 3H), 2.63 (s, 2H), 2.63 (t, 2H, *J* = 7.5 Hz), 4.19 (s, 1H); <sup>13</sup>C NMR (100 MHz, CDCl<sub>3</sub>) δ: 11.4, 13.9, 21.2, 26.7, 30.5, 33.2, 34.1, 38.1, 72.5, 116.8, 118.9, 122.2, 125.1, 144.8, 146.5; m.p. 84–86 °C (EtOAc); ESI-HRMS: *m/z* calcd for C<sub>18</sub>H<sub>29</sub>O<sub>2</sub> [M+H]<sup>+</sup>: 277.2168; found: 277.2168.



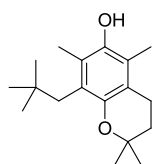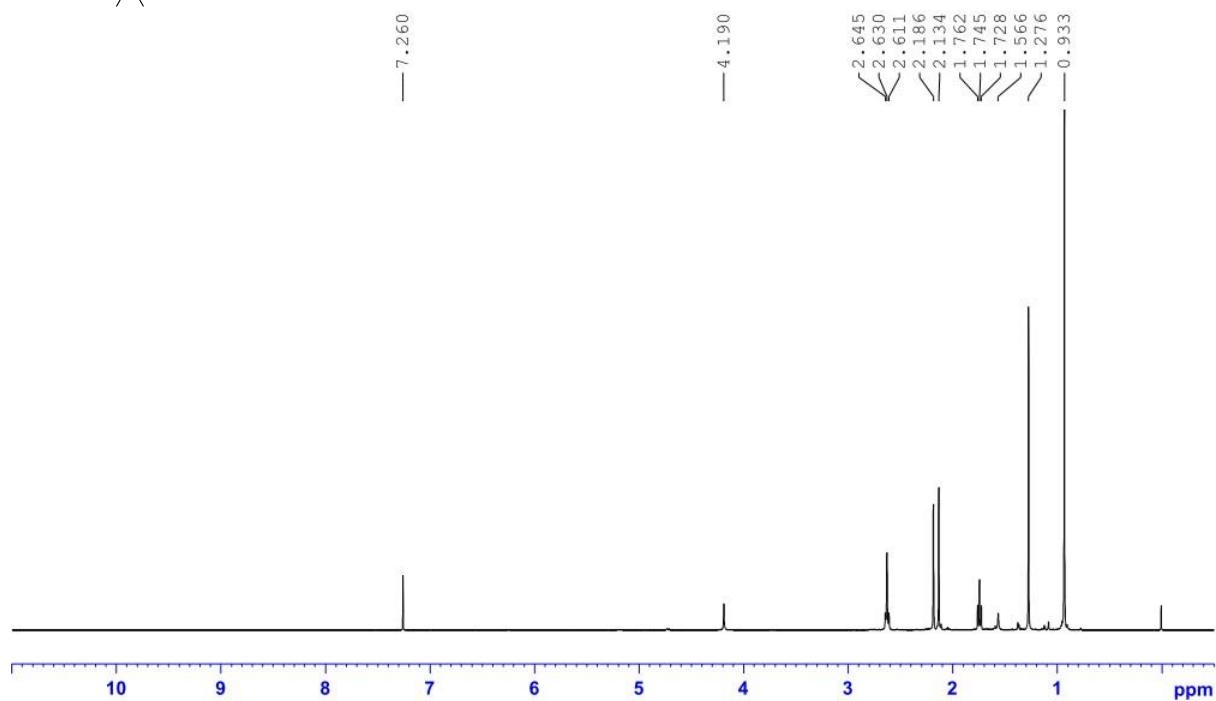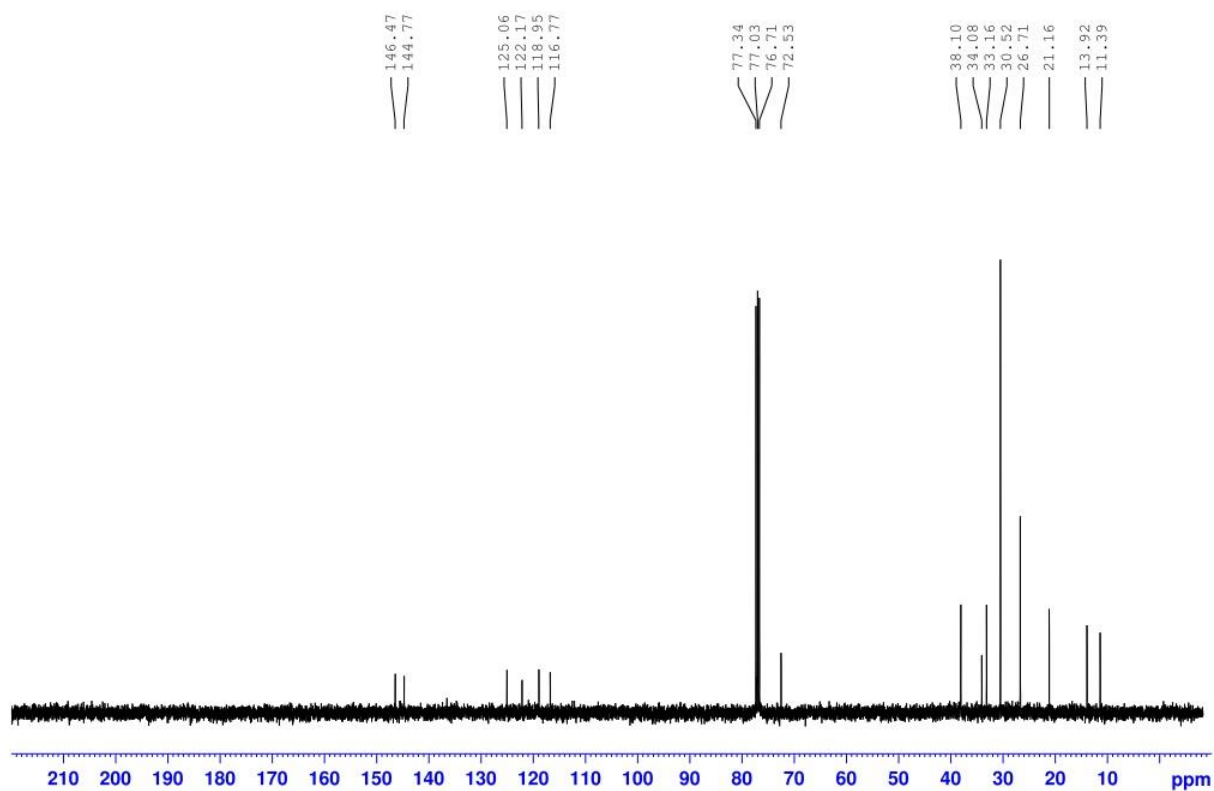

**2,2,5,7-tetramethyl-8-phenyl-3,4-dihydro-2H-1-benzopyran-6-ol**

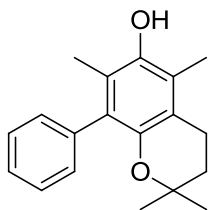

60%; White solid;  $^1\text{H}$  NMR (400 MHz,  $\text{CDCl}_3$ )  $\delta$ : 1.17 (s, 6H), 1.78 (t, 2H,  $J = 7.2$  Hz), 1.99 (s, 3H), 2.20 (s, 3H), 2.69 (t, 2H,  $J = 6.8$  Hz), 4.28 (s, 1H), 7.18–7.19 (d, 2H,  $J = 6.8$  Hz), 7.20–7.31 (m, 1H), 7.36–7.40 (m, 2H);  $^{13}\text{C}$  NMR (100 MHz,  $\text{CDCl}_3$ )  $\delta$ : 11.5, 13.5, 21.2, 26.4, 32.9, 72.5, 118.0, 120.5, 120.9, 126.1, 127.5, 128.9, 130.6, 138.0, 144.9, 145.0; m.p. 88–90 °C (EtOAc); ESI-HRMS:  $m/z$  calcd for  $\text{C}_{19}\text{H}_{23}\text{O}_2$   $[\text{M}+\text{H}]^+$ : 283.1698; found: 283.1696.

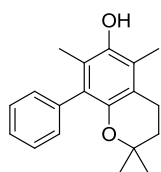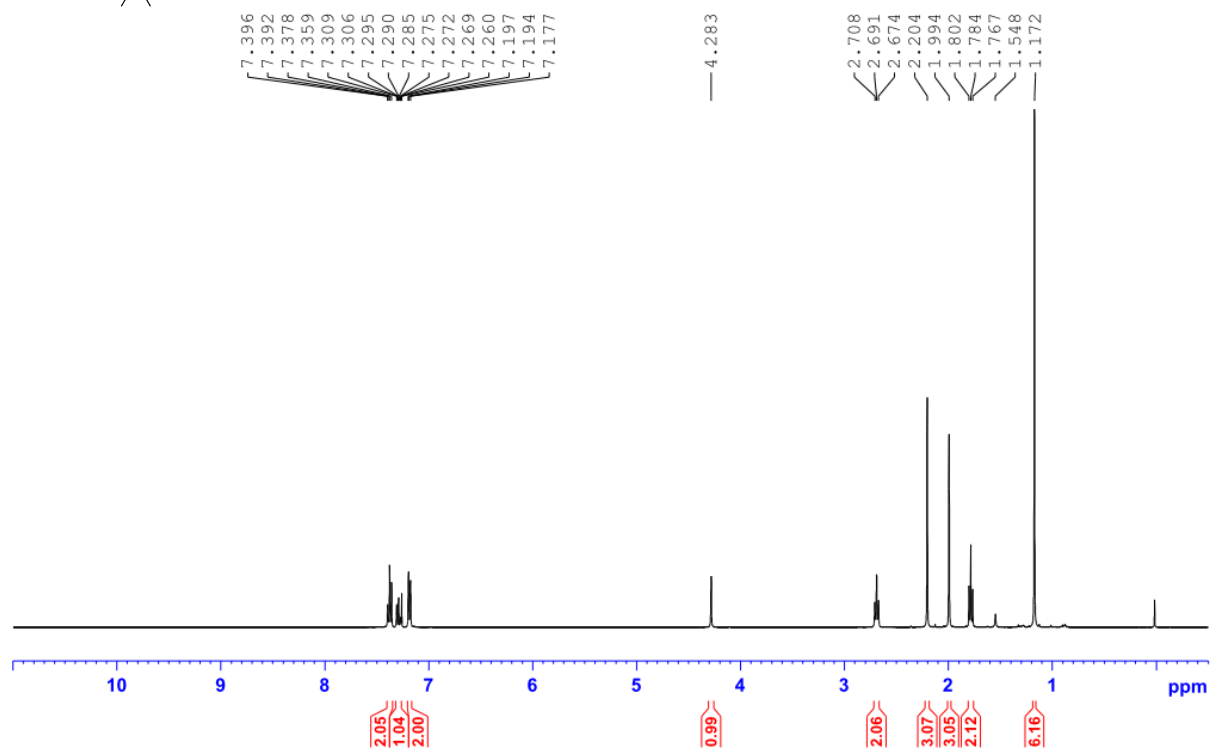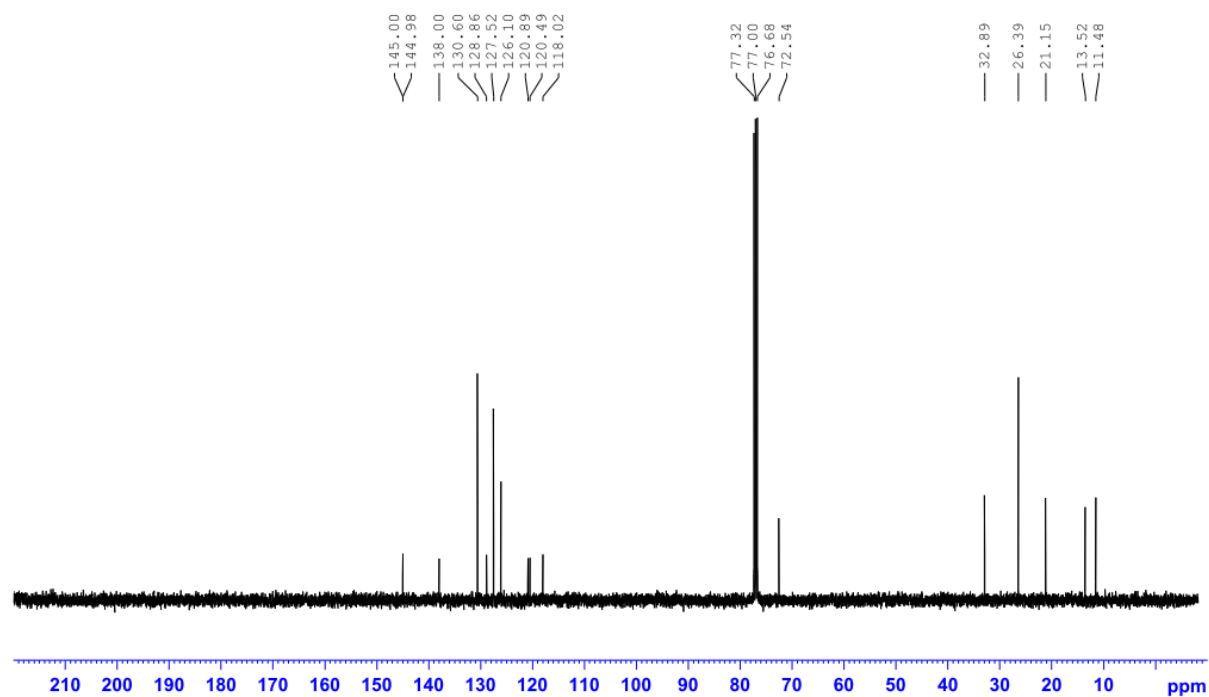

**8-(butan-2-yl)-2,2,5,7-tetramethyl-3,4-dihydro-2H-1-benzopyran-6-ol**

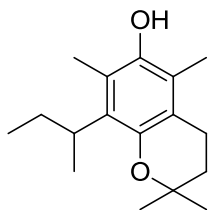

70%; White solid;  $^1\text{H}$  NMR (400 MHz,  $\text{CDCl}_3$ )  $\delta$ : 0.79 (t, 3H,  $J = 7.6$  Hz), 1.28 (s, 6H), 1.29 (d, 3H,  $J = 2.4$  Hz), 1.64–1.71 (m, 1H), 1.77 (t, 2H,  $J = 7.2$  Hz), 1.93–1.94 (m, 1H), 2.10 (s, 3H), 2.21 (s, 3H), 2.62 (t, 3H,  $J = 6.8$  Hz), 2.94 (s, 1H), 4.18 (s, 1H);  $^{13}\text{C}$  NMR (100 MHz,  $\text{CDCl}_3$ )  $\delta$ : 11.4, 12.4, 13.1, 18.8, 21.2, 26.3, 26.5, 27.9, 32.9, 36.5, 72.0, 117.3, 118.9, 120.9, 130.9, 144.5, 146.6; m.p. 47–49 °C (EtOAc); ESI-HRMS:  $m/z$  calcd for  $\text{C}_{17}\text{H}_{27}\text{O}_2$   $[\text{M}+\text{H}]^+$ : 263.2011; found: 263.2009.

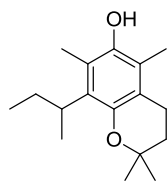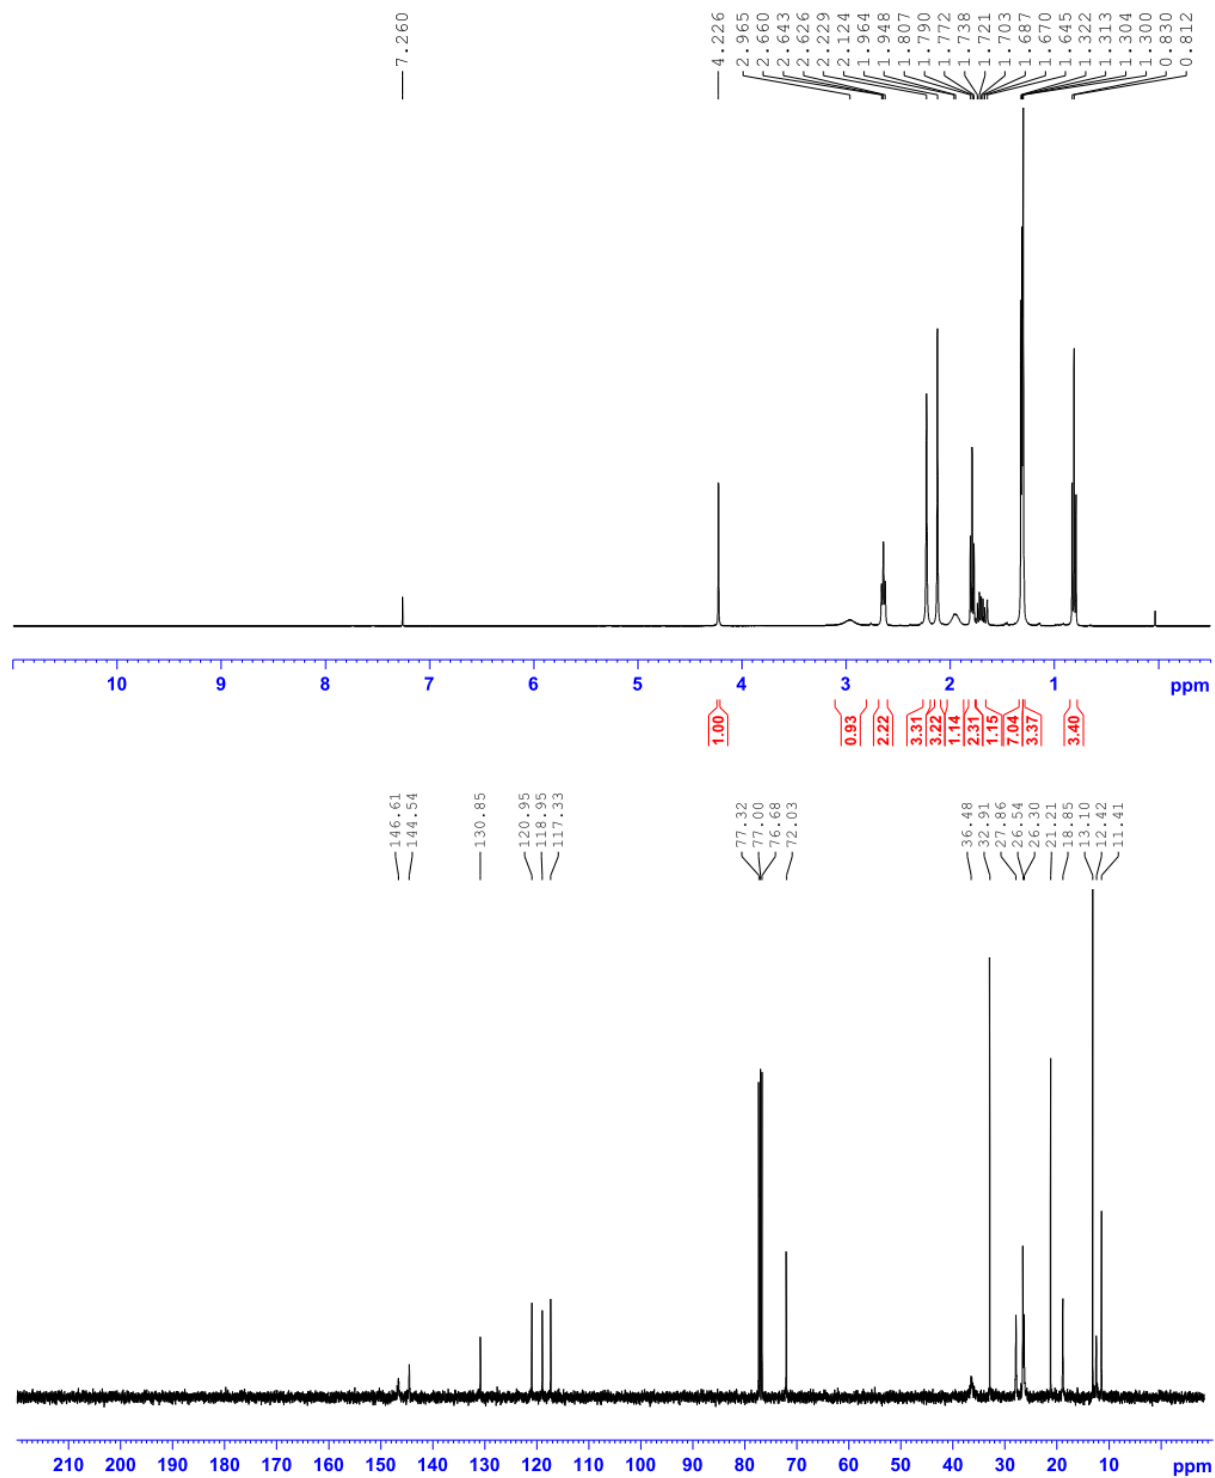

**2,2,5,7-tetramethyl-8-(propan-2-yl)-3,4-dihydro-2H-1-benzopyran-6-ol**

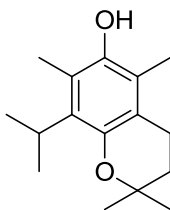

72%; White solid;  $^1\text{H}$  NMR (400 MHz,  $\text{CDCl}_3$ )  $\delta$ : 1.31 (s, 6H), 1.32 (s, 3H), 1.34 (s, 3H), 1.79 (t, 2H,  $J = 6.8$  Hz), 2.11 (s, 3H), 2.23 (s, 3H), 2.64 (t, 2H,  $J = 6.8$  Hz), 3.29 (s, 1H), 4.19 (s, 1H);  $^{13}\text{C}$  NMR (100 MHz,  $\text{CDCl}_3$ )  $\delta$ : 11.4, 12.2, 20.7, 21.2, 26.4, 28.6, 32.9, 72.1, 117.6, 119.0, 120.2, 132.1, 144.6, 146.6; m.p. 66–69 °C (EtOAc); ESI-HRMS:  $m/z$  calcd for  $\text{C}_{16}\text{H}_{25}\text{O}_2$   $[\text{M}+\text{H}]^+$ : 249.1855; found: 249.1858.

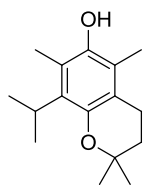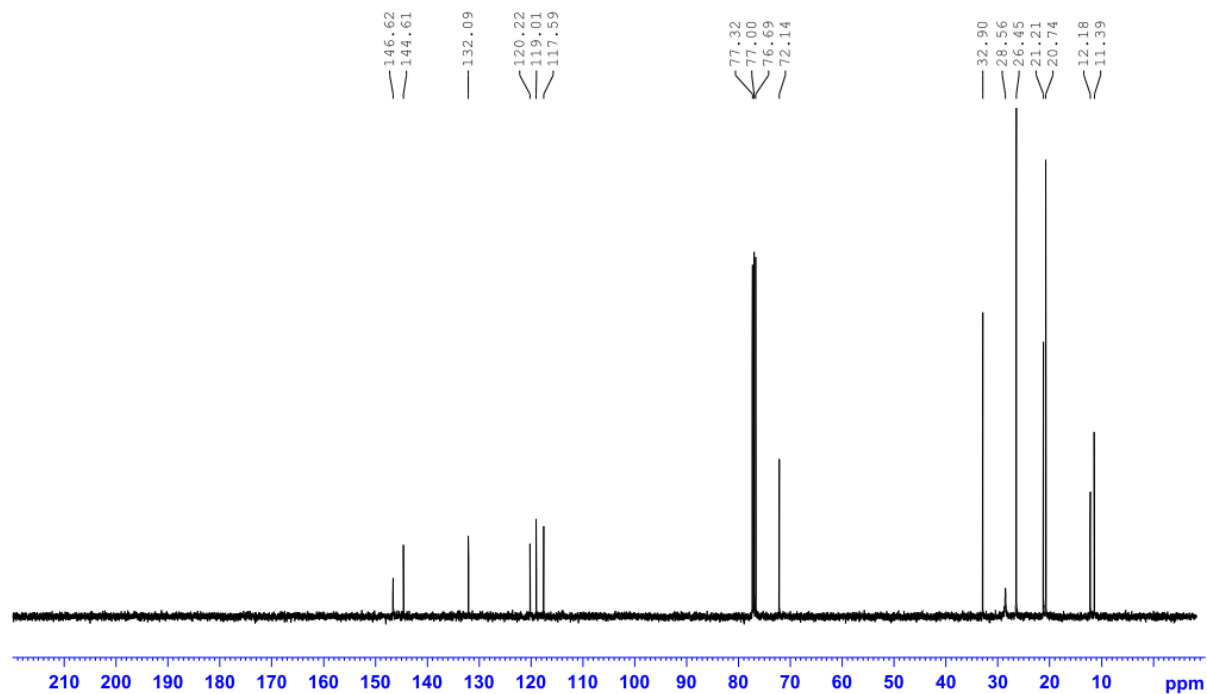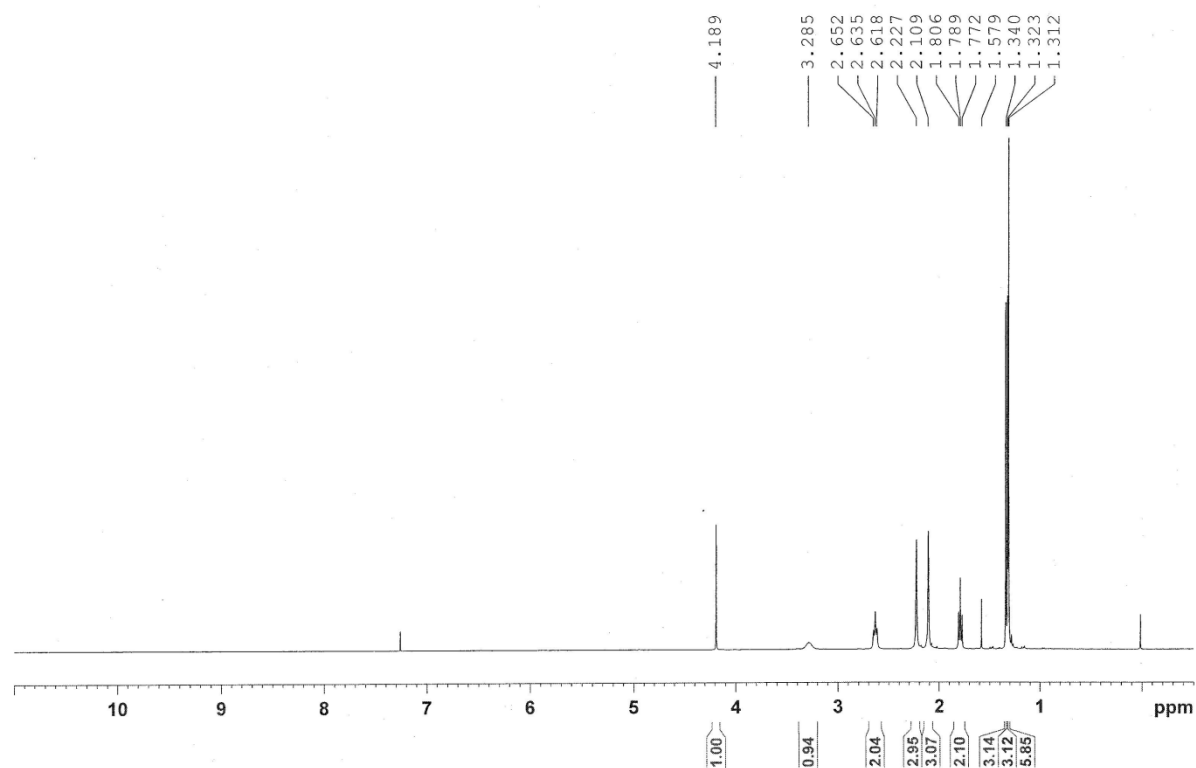

**2,2,5,7-tetramethyl-8-(2,4,6-trimethylphenyl)-3,4-dihydro-2H-1-benzopyran-6-ol<sup>17</sup>**

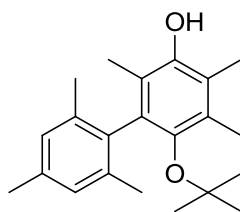

Trimethylphenyl dimethyl hydroquinone (1.2 mmol, 307 mg) and *p*-toluenesulfonic acid (TsOH·H<sub>2</sub>O) (0.15 eq, 0.18 mmol, 34.7 mg) were added to a two-necked flask, then dry toluene (5 ml) was added under nitrogen. After stirring for five minutes, 2-methyl-but-3-en-2-ol (1.2 eq, 0.15 ml) was injected dropwise into the flask by syringe. The reaction was then stirred for 48 hours at 100 °C. After cooling, ethyl acetate was added to dilute the solution. The organic layer was washed with sodium bicarbonate and water, and dried with MgSO<sub>4</sub>. After the solvent was removed, the residue was separated by column chromatography (hexane:EtOAc = 99:1) to give the white solid in 12% yield.

12%; White solid; <sup>1</sup>H NMR (400 MHz, CDCl<sub>3</sub>) δ: 1.10 (s, 6H), 1.73 (t, 2H, *J* = 7.2 Hz), 1.78 (s, 3H), 1.88 (s, 6H), 2.19 (s, 3H), 2.32 (s, 3H), 2.64 (t, 2H, *J* = 7.21 Hz), 4.21 (s, 1H), 6.87 (s, 2H); <sup>13</sup>C NMR (100 MHz, CDCl<sub>3</sub>) δ: 11.5, 12.3, 20.0, 21.1, 21.2, 26.5, 33.0, 72.0, 117.5, 120.1, 120.2, 126.9, 127.4, 134.8, 135.4, 136.2, 144.7, 144.8; m.p. 84–86 °C (EtOAc); ESI-HRMS: *m/z* calcd for C<sub>22</sub>H<sub>28</sub>O<sub>2</sub>Na [M+Na]<sup>+</sup>: 347.1987; found: 347.1992.



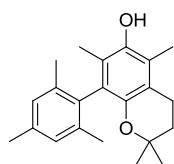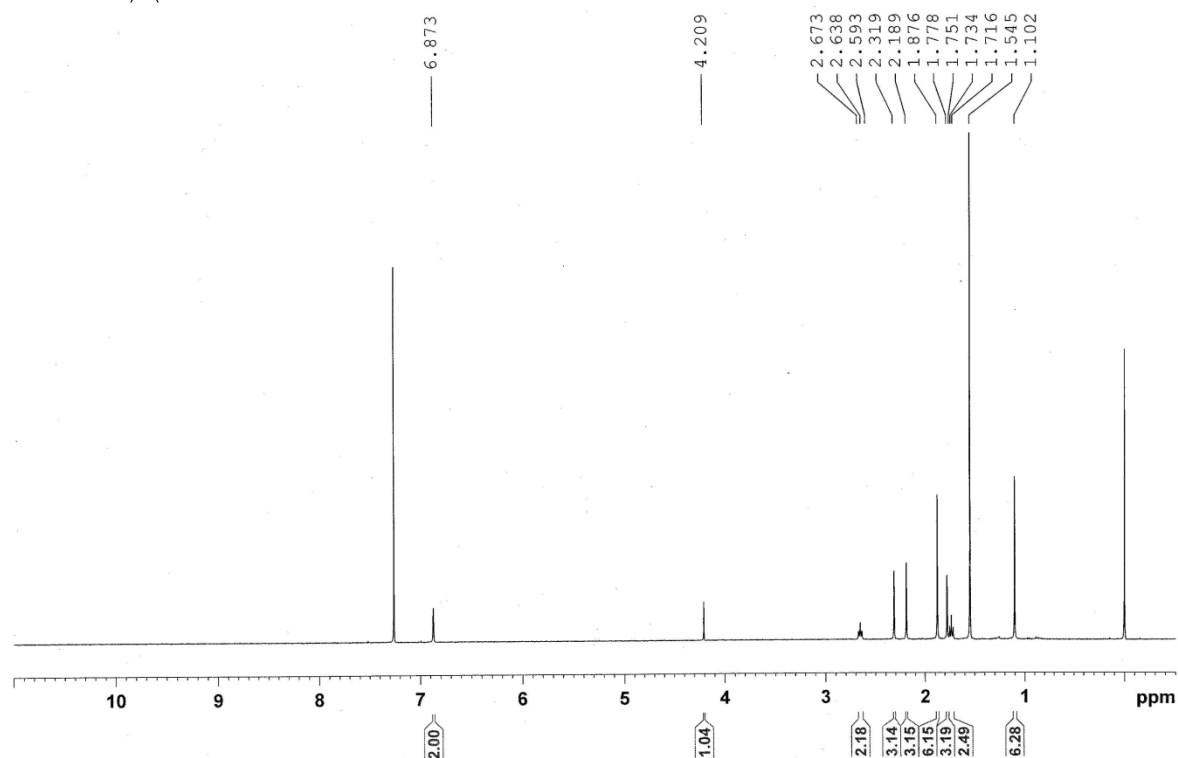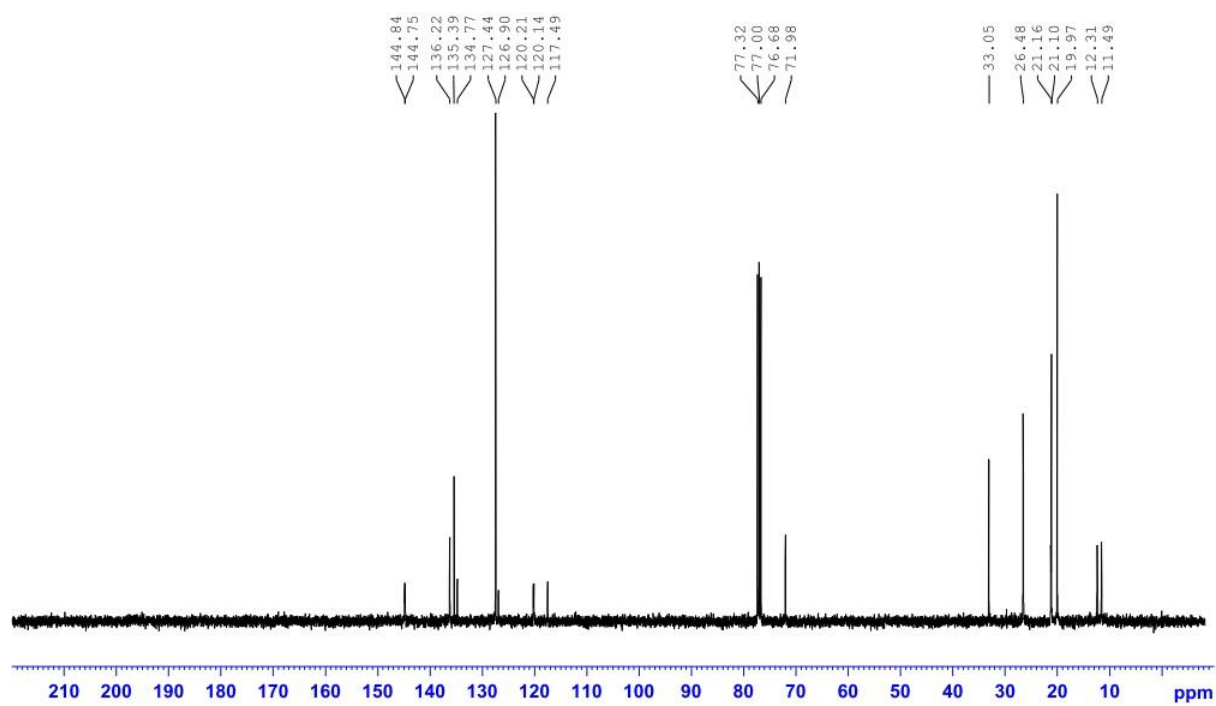

**8-cyclohexyl-2-methoxy-2,5,7-trimethyl-3,4-dihydro-2H-1-benzopyran-6-ol<sup>17</sup>**

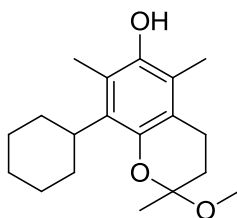

Cyclohexyldimethylhydroquinone (441 mg, 2.0 mmol) was added to a round-bottomed flask, and methanol (10 ml) was injected under nitrogen. After methyl vinyl ketone (0.32 ml, 2.0 mmol) was added, conc. sulfuric acid (2 drops) was added quickly. The solution was stirred for five minutes and trimethyl orthoformate (0.33 ml, 3 mmol) was added, then the solution was stirred for 48 hours at room temperature. After the solvent was removed, ethyl acetate and water were added. The organic layer was washed with sodium bicarbonate and brine, dried with Na<sub>2</sub>SO<sub>4</sub>. The residue was purified by chromatography (hexane:EtOAc = 4:1) to give the white solid product (50%).

50%; White solid; <sup>1</sup>H NMR (400 MHz, CDCl<sub>3</sub>) δ: 1.28–1.37 (m, 3H), 1.56 (s, 3H), 1.56–1.57 (m, 1H), 1.62–1.65 (m, 1H), 1.74–1.85 (m, 5H), 2.07–2.12 (m, 2H), 2.10 (s, 3H), 2.24 (s, 3H), 2.52–2.58 (m, 1H), 2.73–2.82 (m, 2H), 3.30 (s, 3H), 4.24 (s, 1H); <sup>13</sup>C NMR (100 MHz, CDCl<sub>3</sub>) δ: 11.4, 12.3, 20.2, 23.0, 26.6, 27.7, 27.8, 30.2, 30.4, 31.8, 40.7, 49.7, 97.4, 118.8, 119.0, 120.5, 130.9, 145.3; m.p. 136–138 °C (EtOAc); ESI-HRMS: *m/z* calcd for C<sub>19</sub>H<sub>23</sub>O<sub>2</sub> [M+H]<sup>+</sup>: 283.1698; found: 283.1696.

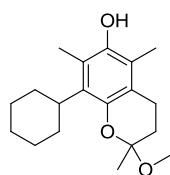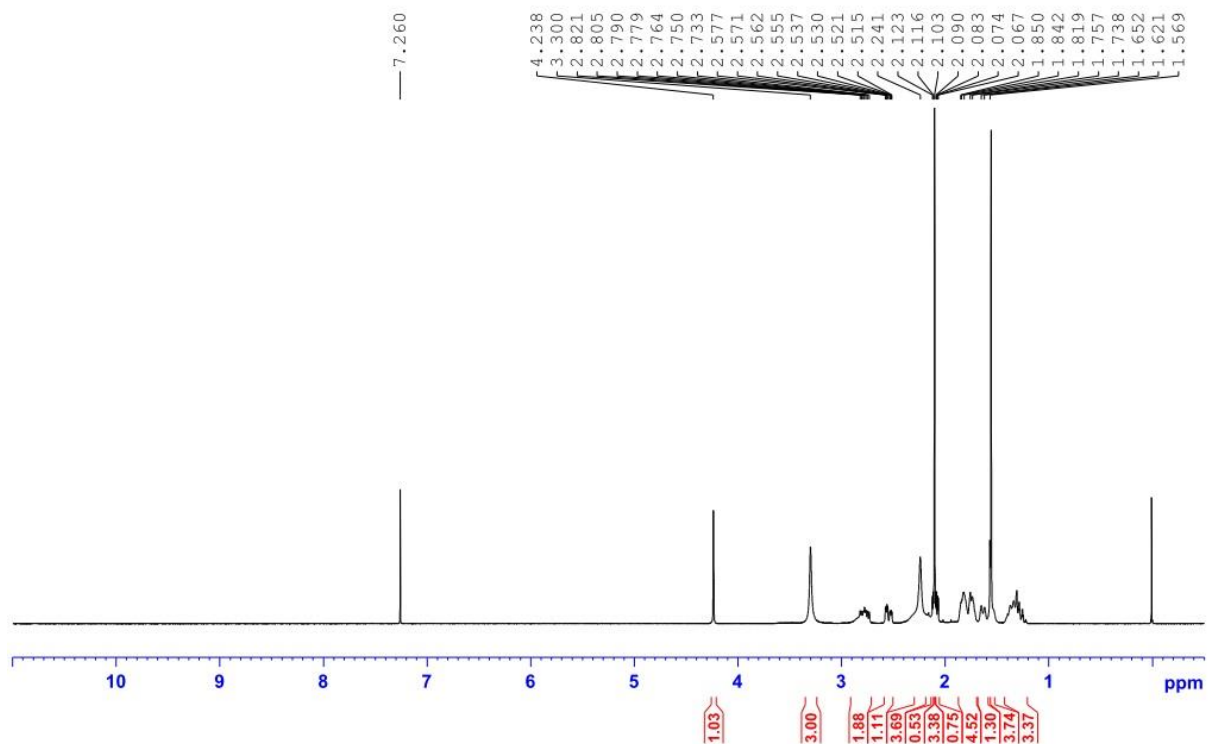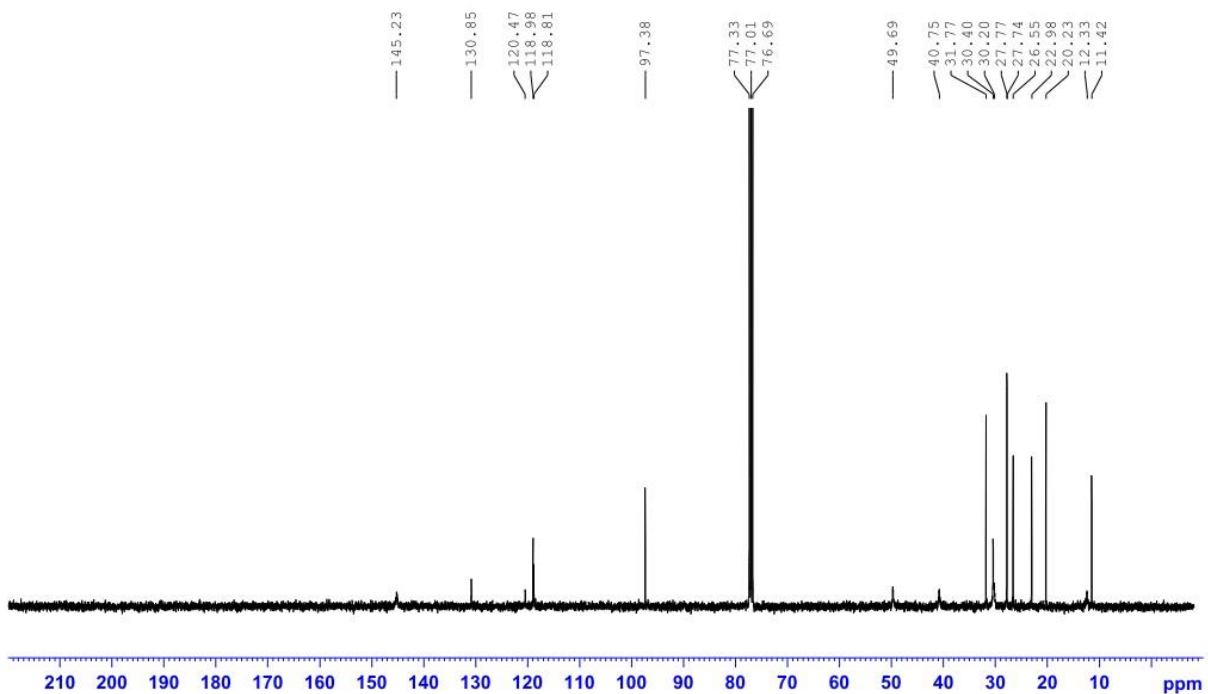

**2,5,7,8-tetramethyl-2-phenyl-3,4-dihydro-2H-1-benzopyran-6-ol<sup>17</sup>**

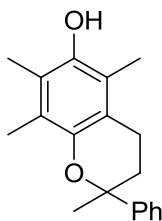

Trimethyl hydroquinone (1.2 mmol, 183 mg) and *p*-toluenesulfonic acid (TsOH·H<sub>2</sub>O) (0.152 eq, 0.18 mmol, 34.7 mg) were added to a two-necked flask, and dry toluene (5 ml) was added under nitrogen. After stirring for five minutes, 2-phenyl-but-3-en-2-ol (1.2 eq, 213 mg) was injected dropwise into the flask by syringe. Then it was stirred for 18 hours at 100 °C. After cooling, ethyl acetate was added to dilute the solution, and the organic layer was washed with sodium bicarbonate and water, and dried with MgSO<sub>4</sub>. The solvent was removed, the residue was separated by column chromatography (hexane:EtOAc = 49:1) to give the white solid in 45% yield.

45%; White solid; <sup>1</sup>H NMR (400 MHz, CDCl<sub>3</sub>) δ 1.61 (s, 3H), 2.02 (s, 3H), 2.05–2.12 (m, 1H), 2.21 (s, 3H), 2.31 (s, 3H), 2.36–2.43 (m, 2H), 2.60–2.64 (m, 1H), 4.19 (s, 1H), 7.20–7.23 (m, 1H), 7.28–7.32 (m, 2H), 7.36–7.38 (m, 2H); <sup>13</sup>C NMR (100 MHz, CDCl<sub>3</sub>) δ: 11.2, 11.9, 12.2, 21.0, 30.1, 32.8, 76.9, 117.5, 118.4, 121.1, 122.2, 124.8, 126.5, 128.3, 144.8, 145.6, 146.2; m.p. 77–79 °C (EtOAc); ESI-HRMS: *m/z* calcd for C<sub>19</sub>H<sub>29</sub>O<sub>3</sub> [M+H]<sup>+</sup>: 305.2117; found: 305.2114.

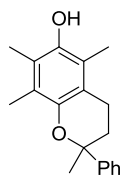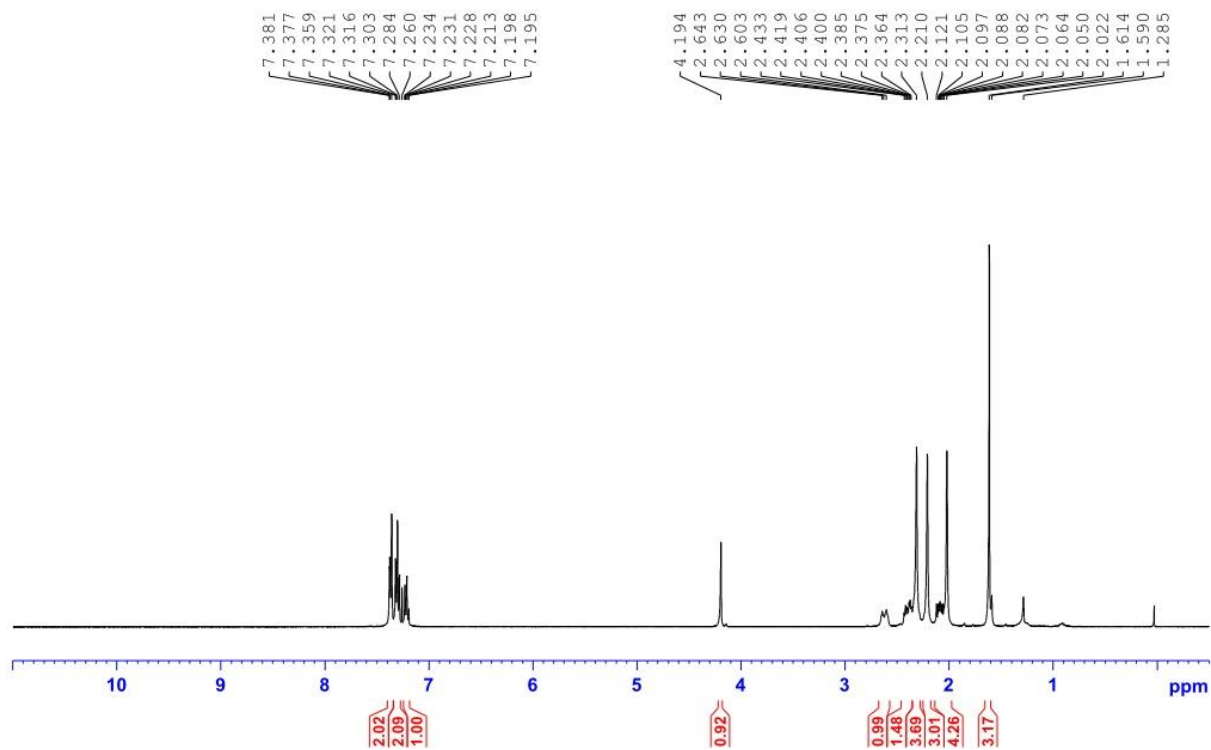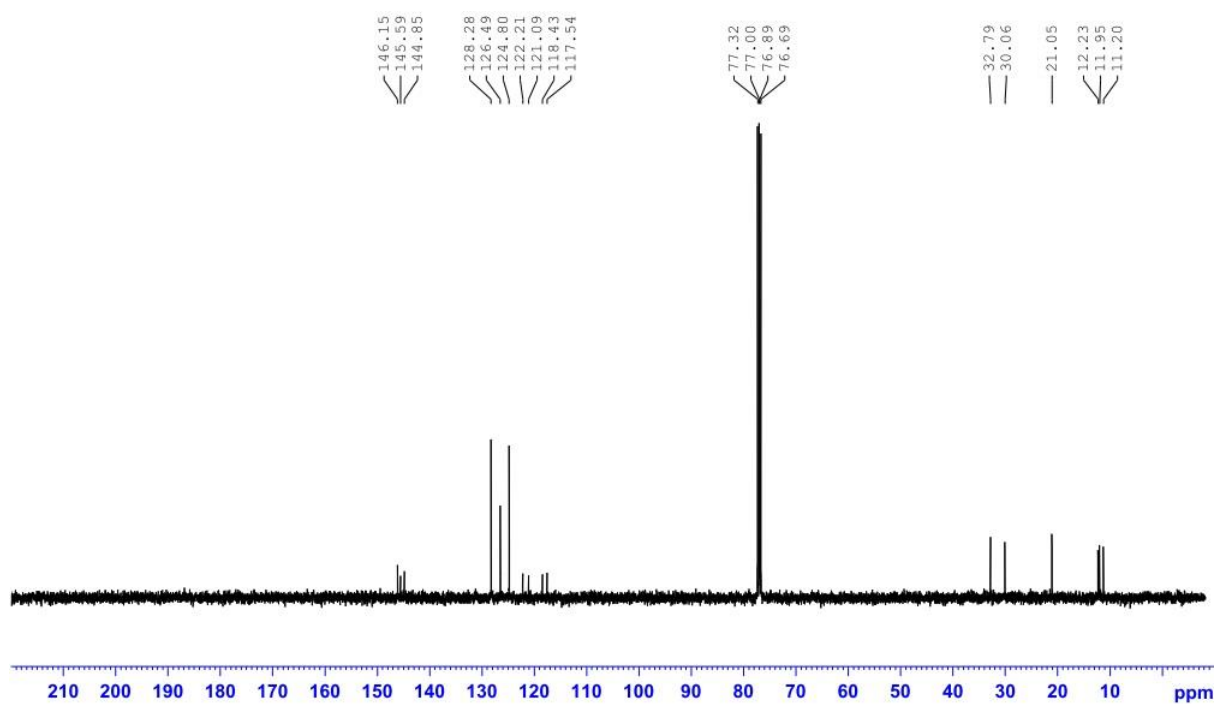

**8-cyclohexyl-2,2,5,7-tetramethyl-3,4-dihydro-2H-1-benzopyran-6-ol**

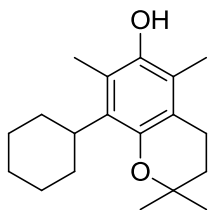

56%; White solid;  $^1\text{H}$  NMR (400 MHz,  $\text{CDCl}_3$ )  $\delta$  1.28–1.32 (m, 9H), 1.52–1.55 (m, 2H), 1.77–1.83 (m, 5H), 2.11(s, 3H), 2.24 (brs, 5H), 2.64 (t, 2H,  $J = 6.8$  Hz), 2.82 (brs, 1H), 4.20 (s, 1H);  $^{13}\text{C}$  NMR (100 MHz,  $\text{CDCl}_3$ )  $\delta$ : 11.4, 12.3, 21.3, 26.4, 26.5, 27.7, 29.8, 32.9, 40.5, 72.2, 117.6, 119.1, 120.4, 131.4, 144.7, 146.7; m.p. 85–88 °C (EtOAc); ESI-HRMS:  $m/z$  calcd for  $\text{C}_{19}\text{H}_{29}\text{O}_2$   $[\text{M}+\text{H}]^+$ : 289.2168; found: 289.2163.

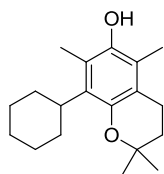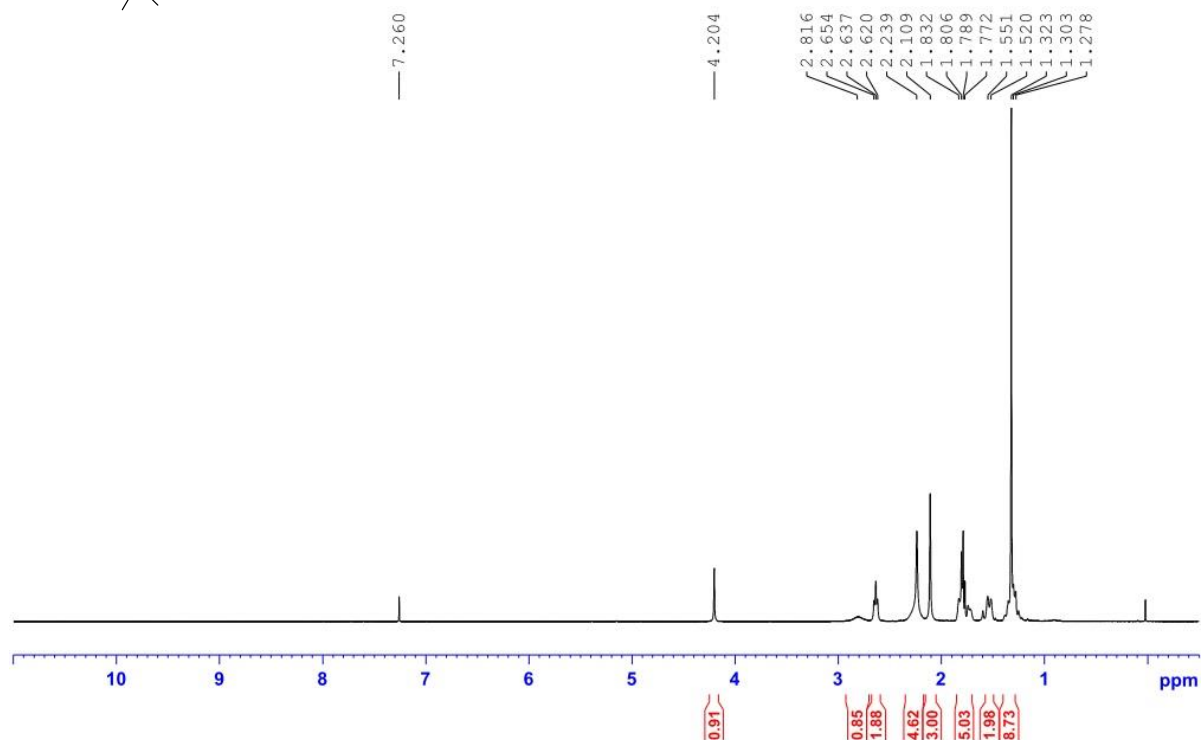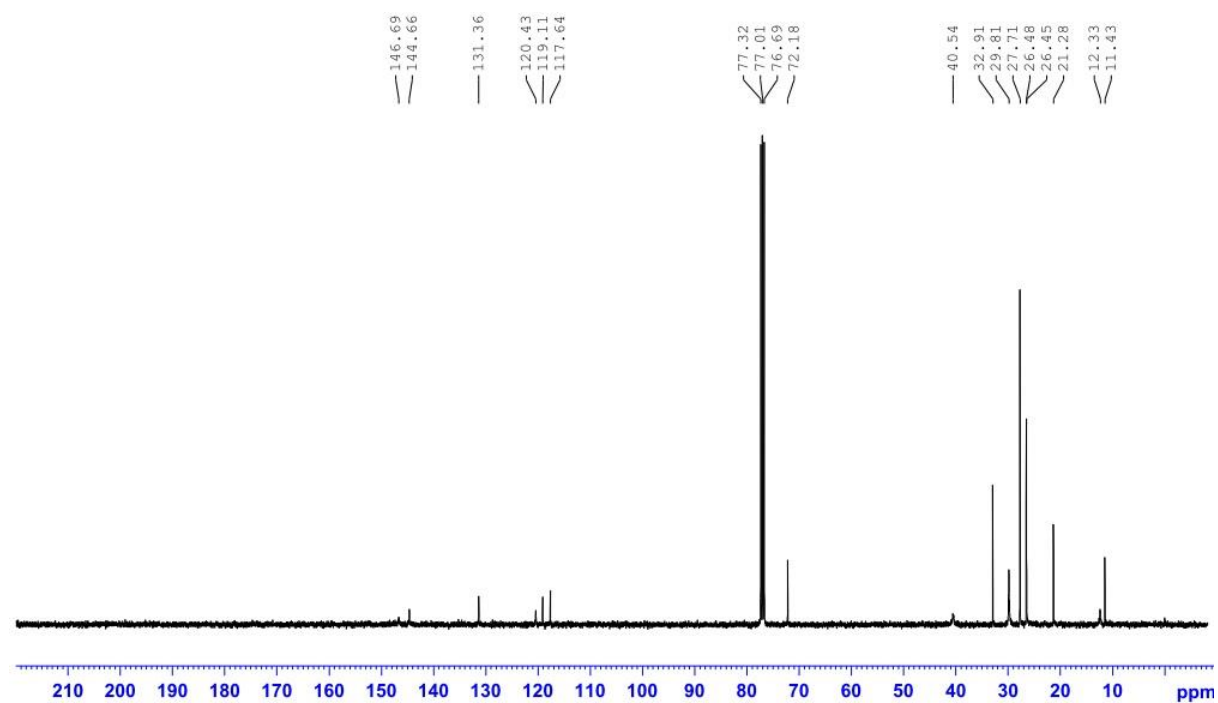

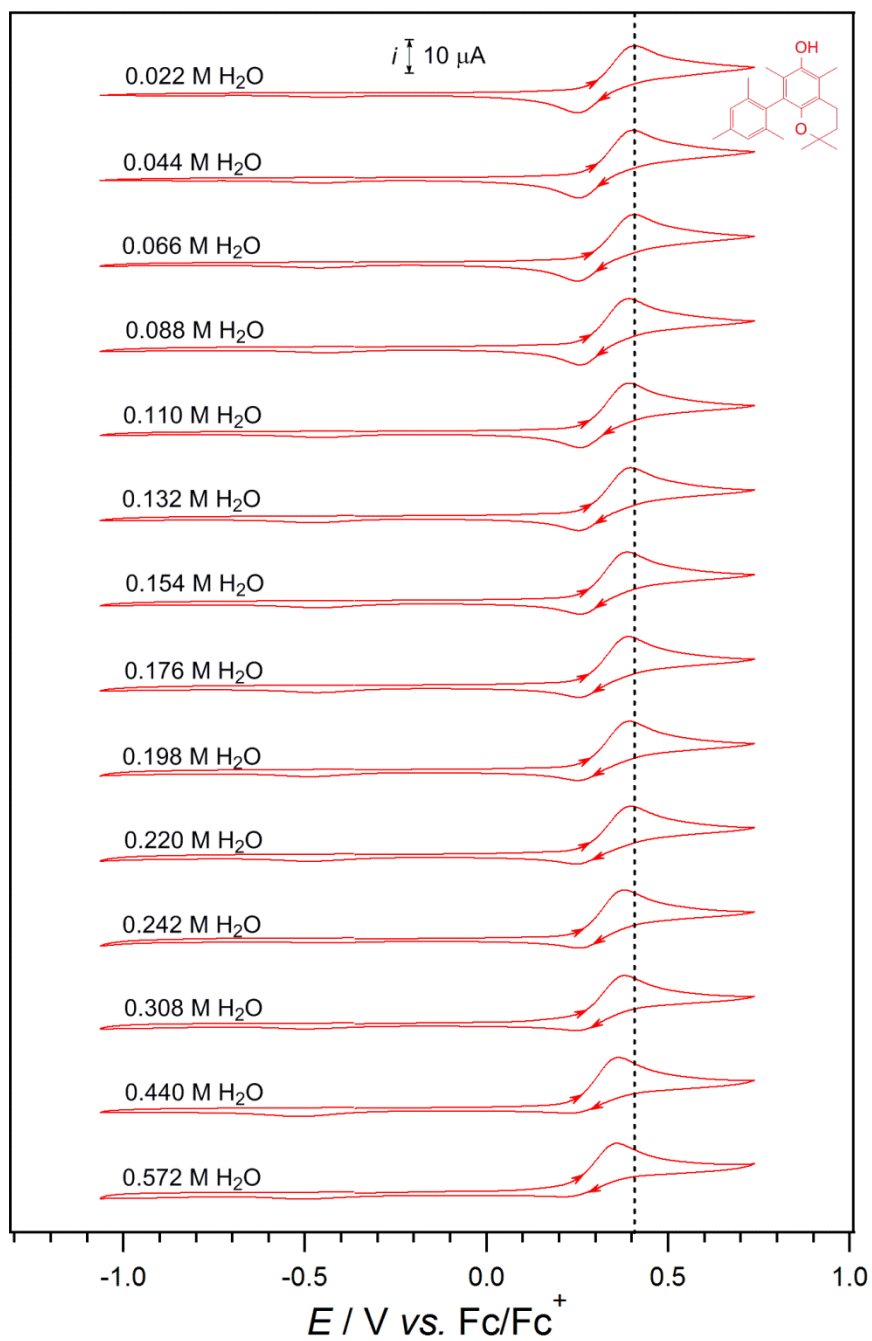

**Figure S1.** CVs of 2 mM of  $R_3$  2,4,6-trimethylphenyl substituted compound in  $\text{CH}_3\text{CN}$  containing 0.2 M  $\text{Bu}_4\text{NPF}_6$  at a 1 mm diameter circular planar Pt electrode at  $22 \pm 2^\circ\text{C}$  at a scan rate of  $0.1 \text{ V s}^{-1}$  at the specified concentration of water.



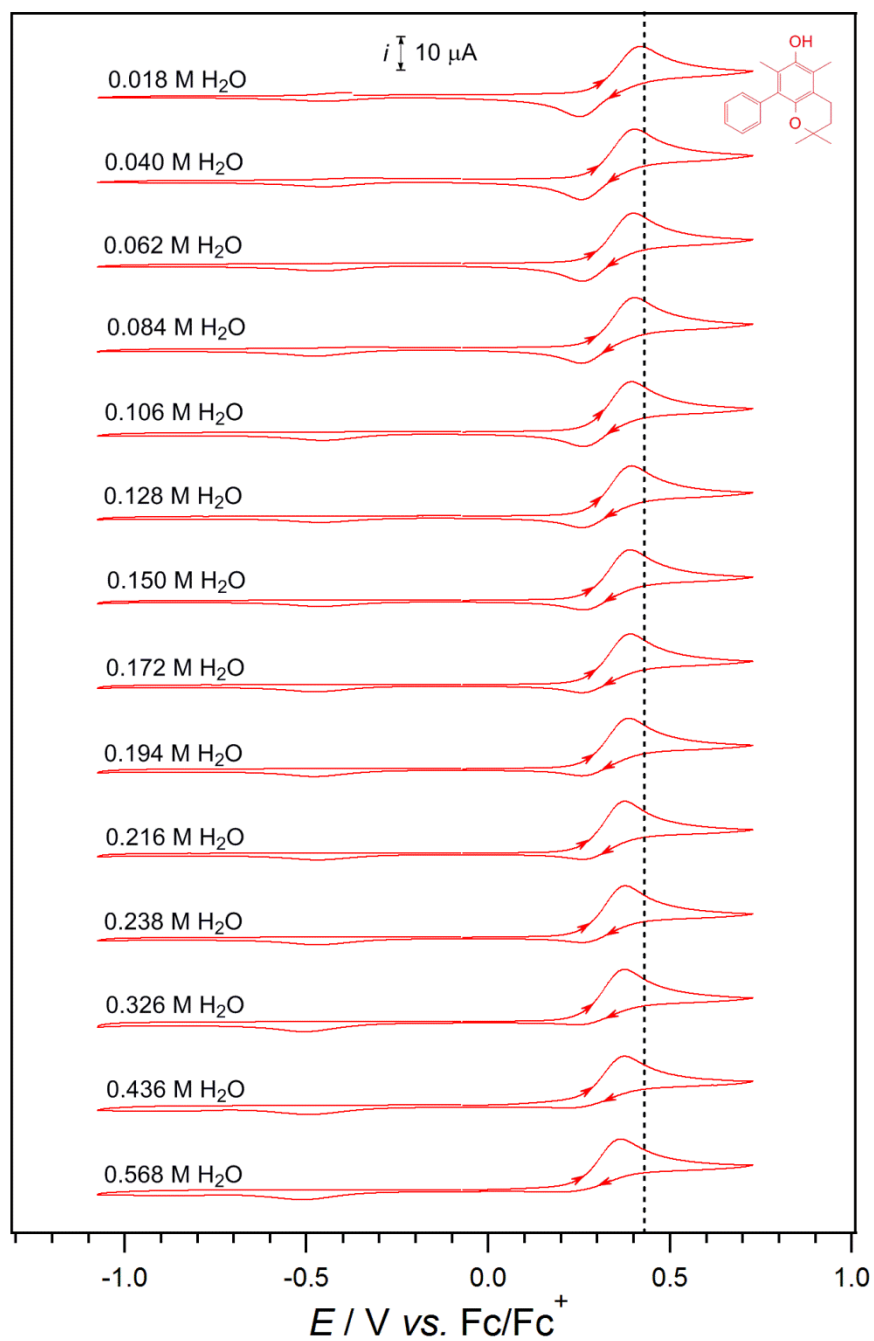

**Figure S2.** CVs of 2 mM of  $R_3$  phenyl substituted compound in  $\text{CH}_3\text{CN}$  containing 0.2 M  $\text{Bu}_4\text{NPF}_6$  at a 1 mm diameter circular planar Pt electrode at  $22 \pm 2^\circ\text{C}$  at a scan rate of  $0.1 \text{ V s}^{-1}$  at the specified concentration of water.

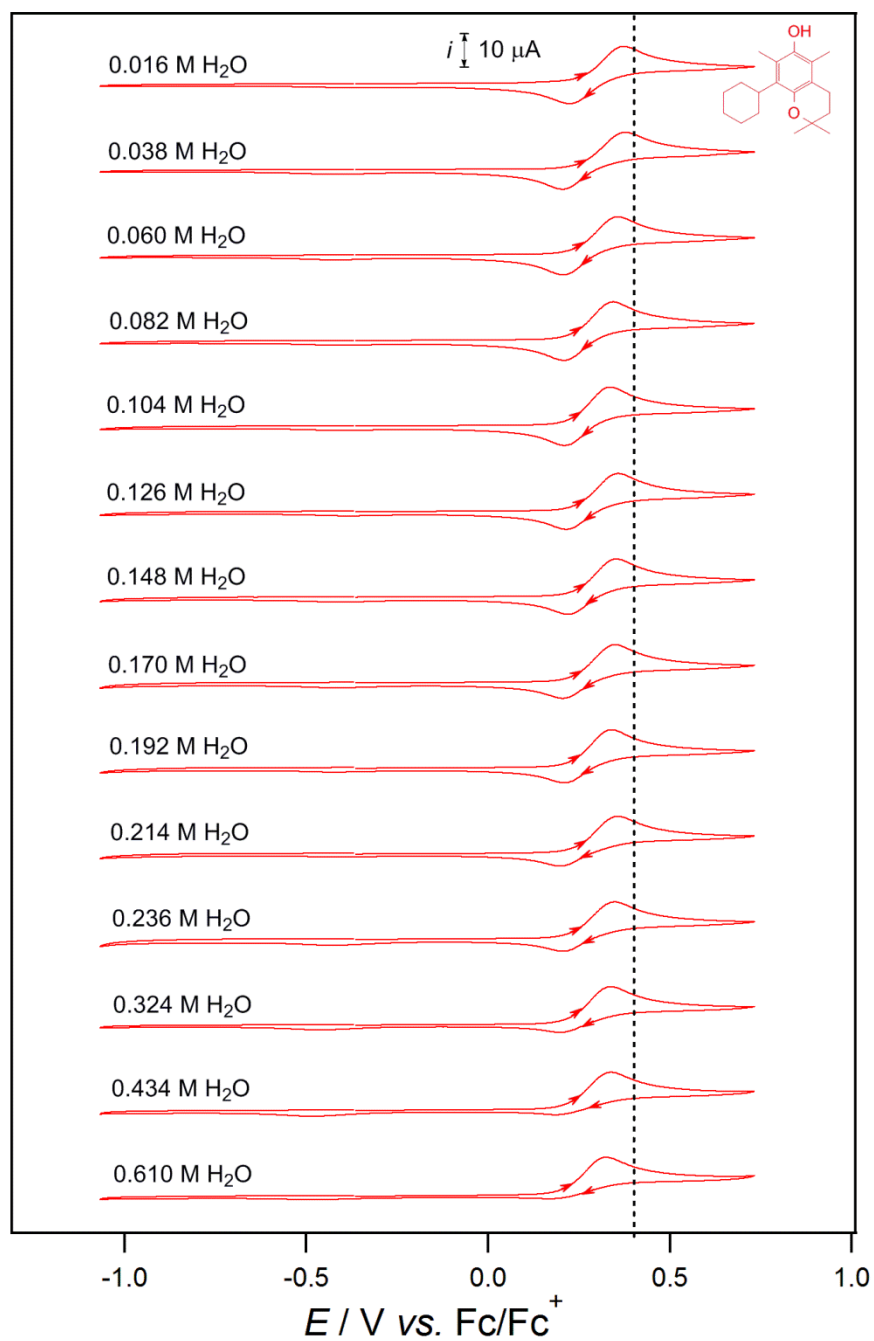

**Figure S3.** CVs of 2 mM of  $R_3$  cyclohexyl substituted compound in  $\text{CH}_3\text{CN}$  containing 0.2 M  $\text{Bu}_4\text{NPF}_6$  at a 1 mm diameter circular planar Pt electrode at  $22 \pm 2^\circ\text{C}$  at a scan rate of  $0.1 \text{ V s}^{-1}$  at the specified concentration of water.

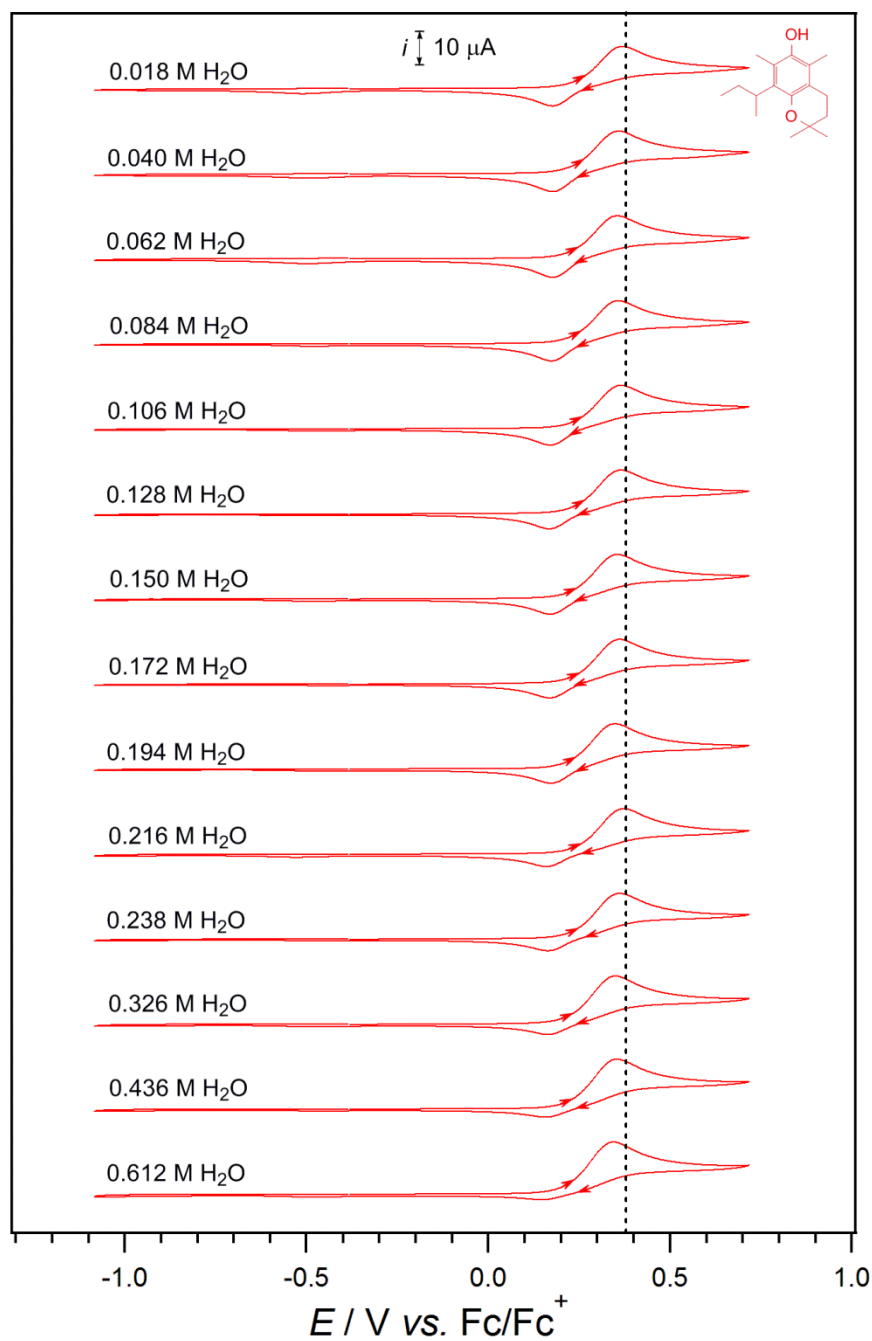

**Figure S4.** CVs of 2 mM of  $R_3$  *sec*-butyl substituted compound in  $\text{CH}_3\text{CN}$  containing 0.2 M  $\text{Bu}_4\text{NPF}_6$  at a 1 mm diameter circular planar Pt electrode at  $22 \pm 2^\circ\text{C}$  at a scan rate of  $0.1 \text{ V s}^{-1}$  at the specified concentration of water.

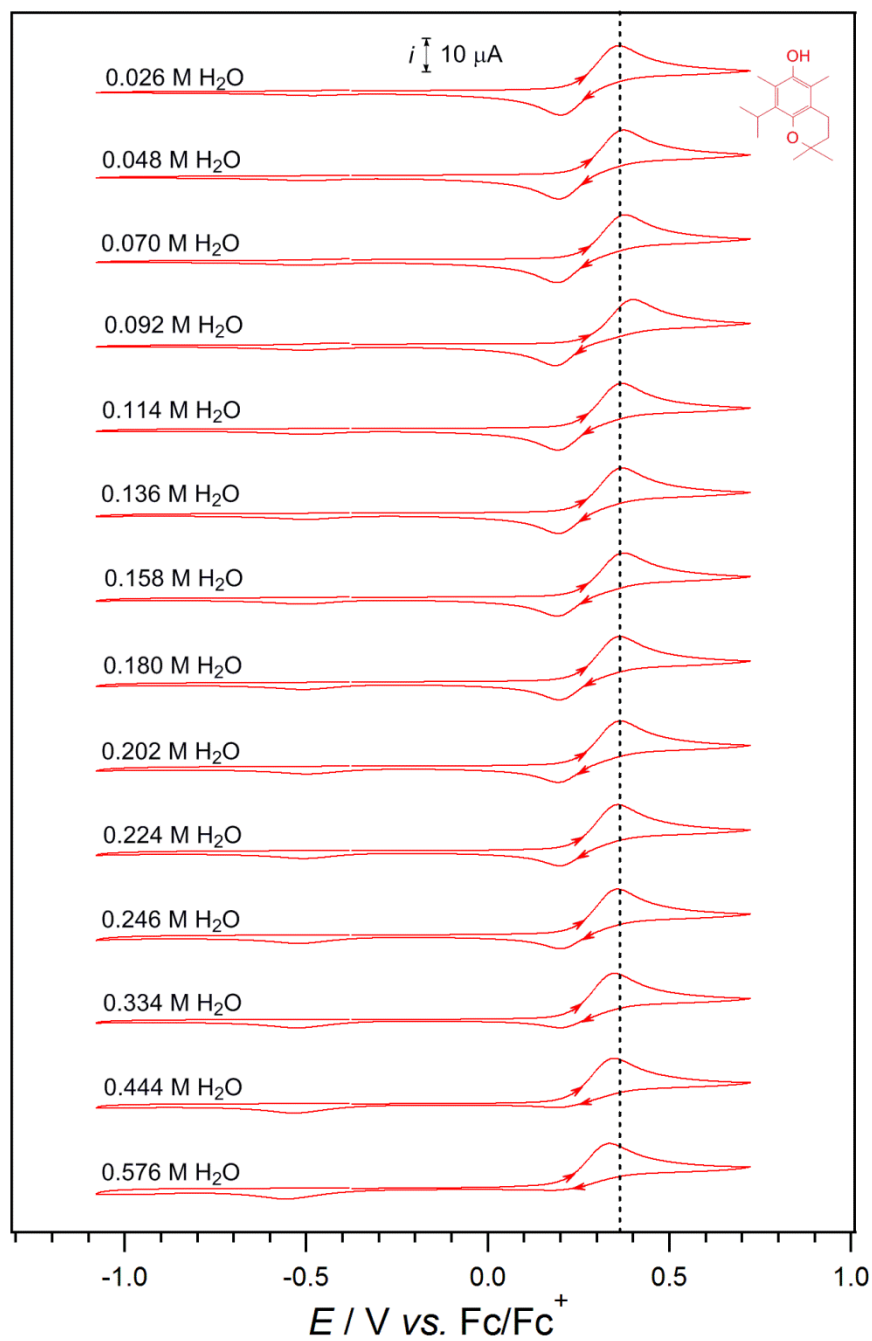

**Figure S5.** CVs of 2 mM of  $R_3$  isopropyl substituted compound in  $\text{CH}_3\text{CN}$  containing 0.2 M  $\text{Bu}_4\text{NPF}_6$  at a 1 mm diameter circular planar Pt electrode at  $22 \pm 2^\circ\text{C}$  at a scan rate of  $0.1 \text{ V s}^{-1}$  at the specified concentration of water.

### 3. Computational Studies

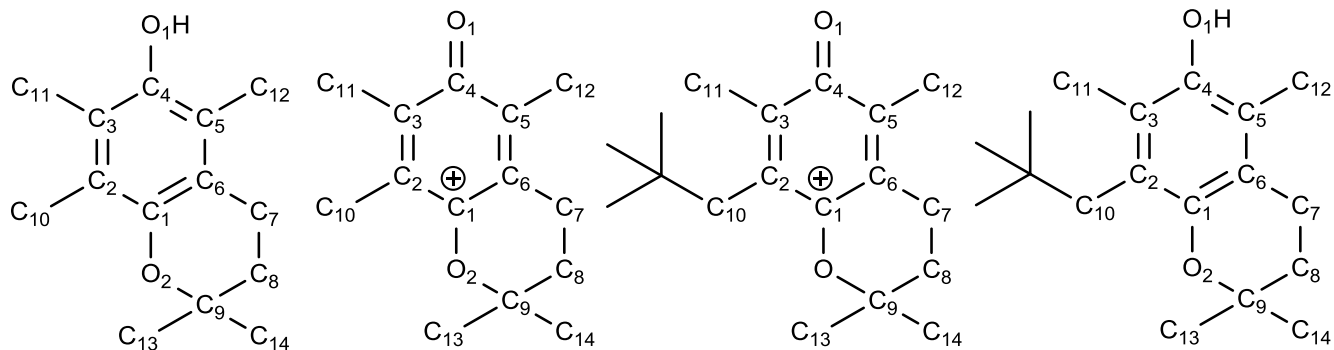

**Figure S6.** Numbering system for atoms in density functional theory calculations.

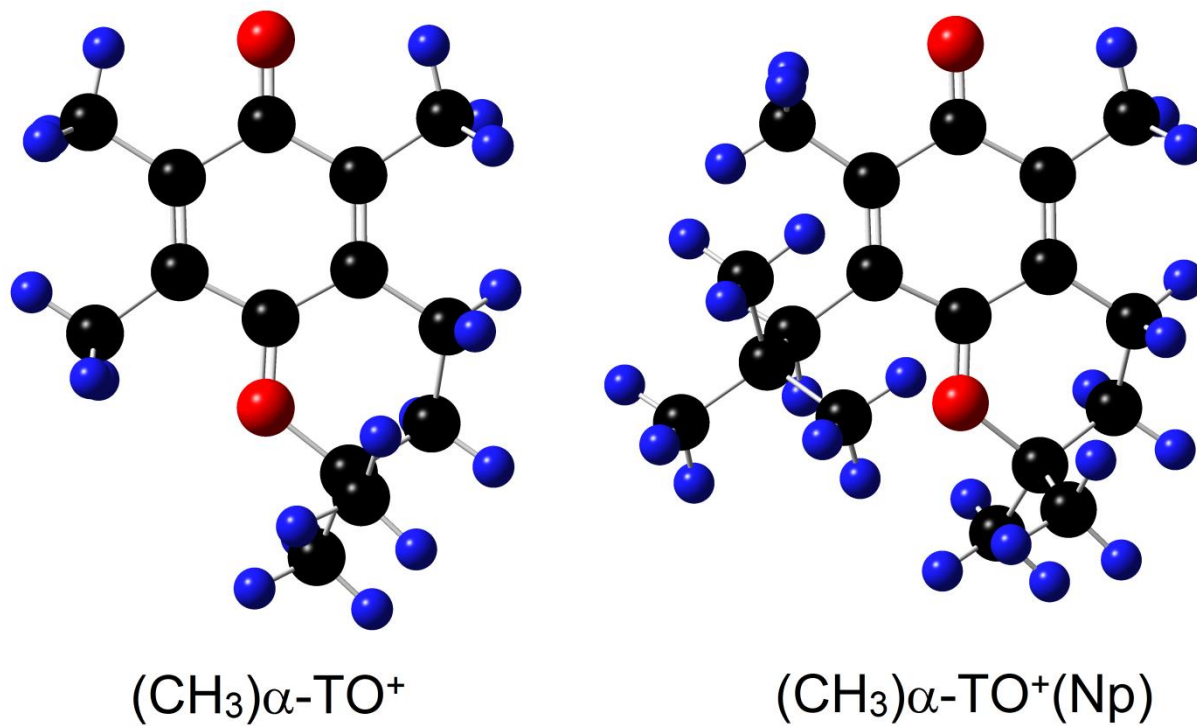

**Figure S7.** Density functional theory B3LYP/6-311+G(2df,p) optimized structures of the diamagnetic cations

**Table S1.** Calculated (B3LYP/6-311+G(2df,p)) bond lengths and energies (gaseous and solution phase) for the  $\alpha$ -tocopherol model compound [(CH<sub>3</sub>) $\alpha$ -TOH] and its neopentyl derivative [(CH<sub>3</sub>)- $\alpha$ TOH(Np)] and their associated diamagnetic cationic forms, (CH<sub>3</sub>) $\alpha$ -TO<sup>+</sup> and (CH<sub>3</sub>)- $\alpha$ TO<sup>+</sup>(Np).

| Bond                            | Bond Length / Å                  |                    |                                      |                    |                                              |                    |                                                   |                    |
|---------------------------------|----------------------------------|--------------------|--------------------------------------|--------------------|----------------------------------------------|--------------------|---------------------------------------------------|--------------------|
|                                 | (CH <sub>3</sub> ) $\alpha$ -TOH |                    | (CH <sub>3</sub> )- $\alpha$ TOH(Np) |                    | (CH <sub>3</sub> ) $\alpha$ -TO <sup>+</sup> |                    | (CH <sub>3</sub> )- $\alpha$ TO <sup>+</sup> (Np) |                    |
|                                 | Gas                              | CH <sub>3</sub> CN | Gas                                  | CH <sub>3</sub> CN | Gas                                          | CH <sub>3</sub> CN | Gas                                               | CH <sub>3</sub> CN |
| C <sub>1</sub> -O <sub>2</sub>  | 1.37726                          | 1.37746            | 1.37630                              | 1.37558            | 1.28499                                      | 1.28052            | 1.28403                                           | 1.27935            |
| C <sub>4</sub> -O <sub>1</sub>  | 1.37950                          | 1.38135            | 1.37993                              | 1.38234            | 1.21056                                      | 1.21491            | 1.21134                                           | 1.21538            |
| C <sub>9</sub> -O <sub>2</sub>  | 1.44333                          | 1.45069            | 1.44571                              | 1.45147            | 1.51975                                      | 1.51976            | 1.52089                                           | 1.52460            |
| C <sub>1</sub> -C <sub>2</sub>  | 1.40232                          | 1.40282            | 1.40930                              | 1.41091            | 1.45676                                      | 1.45890            | 1.46491                                           | 1.46753            |
| C <sub>2</sub> -C <sub>3</sub>  | 1.39760                          | 1.39948            | 1.40324                              | 1.40422            | 1.35464                                      | 1.35148            | 1.35913                                           | 1.35583            |
| C <sub>3</sub> -C <sub>4</sub>  | 1.39692                          | 1.39730            | 1.40221                              | 1.40312            | 1.50042                                      | 1.49782            | 1.49939                                           | 1.49805            |
| C <sub>4</sub> -C <sub>5</sub>  | 1.39474                          | 1.39624            | 1.38990                              | 1.39086            | 1.50521                                      | 1.50201            | 1.50044                                           | 1.49670            |
| C <sub>5</sub> -C <sub>6</sub>  | 1.40389                          | 1.40410            | 1.40134                              | 1.40253            | 1.35427                                      | 1.35206            | 1.35237                                           | 1.35051            |
| C <sub>1</sub> -C <sub>6</sub>  | 1.39720                          | 1.39889            | 1.39610                              | 1.39681            | 1.44826                                      | 1.44769            | 1.45303                                           | 1.45178            |
| C <sub>6</sub> -C <sub>7</sub>  | 1.51383                          | 1.51392            | 1.51107                              | 1.51130            | 1.50726                                      | 1.50394            | 1.50667                                           | 1.50287            |
| C <sub>7</sub> -C <sub>8</sub>  | 1.52690                          | 1.52659            | 1.52543                              | 1.52532            | 1.52690                                      | 1.52583            | 1.52580                                           | 1.52526            |
| C <sub>8</sub> -C <sub>9</sub>  | 1.52985                          | 1.52859            | 1.52859                              | 1.52766            | 1.52085                                      | 1.51982            | 1.51950                                           | 1.51894            |
| C <sub>2</sub> -C <sub>10</sub> | 1.50699                          | 1.50782            | 1.51689                              | 1.51738            | 1.50134                                      | 1.49916            | 1.51159                                           | 1.51024            |
| C <sub>3</sub> -C <sub>11</sub> | 1.50731                          | 1.50829            | 1.51100                              | 1.51121            | 1.49382                                      | 1.49495            | 1.49044                                           | 1.49161            |
| C <sub>5</sub> -C <sub>12</sub> | 1.51047                          | 1.51051            | 1.50725                              | 1.50803            | 1.48971                                      | 1.49004            | 1.49015                                           | 1.49074            |
| C <sub>9</sub> -C <sub>13</sub> | 1.53243                          | 1.53134            | 1.53301                              | 1.53203            | 1.52293                                      | 1.52237            | 1.52287                                           | 1.52153            |
| C <sub>9</sub> -C <sub>14</sub> | 1.52422                          | 1.52365            | 1.52484                              | 1.52431            | 1.51771                                      | 1.51747            | 1.51845                                           | 1.51795            |
|                                 |                                  |                    |                                      |                    |                                              |                    |                                                   |                    |
| Energy / hartrees               | -696.226614                      | -696.233328        | -853.523478                          | -853.529546        | -695.358120                                  | -695.424351        | -852.656778                                       | -852.721333        |
| ZPE / hartrees                  | 0.310284                         | 0.309934           | 0.423576                             | 0.422933           | 0.299181                                     | 0.298922           | 0.412232                                          | 0.412188           |
| Total Energy / hartrees         | -695.919774                      | -695.926834        | -853.104604                          | -853.111307        | -695.062260                                  | -695.128747        | -852.249122                                       | -852.313720        |

**Table S2.** Calculated (B3LYP/6-31G(d)) Mulliken (default) charges (gaseous and solution phase) for the  $\alpha$ -tocopherol model compound [(CH<sub>3</sub>) $\alpha$ -TOH] and its neopentyl derivative [(CH<sub>3</sub>)- $\alpha$ TOH(Np)] and their associated diamagnetic cationic forms, (CH<sub>3</sub>) $\alpha$ -TO<sup>+</sup> and (CH<sub>3</sub>)- $\alpha$ TO<sup>+</sup>(Np).

| Bond            | Charge                           |                    |                                      |                    |                                              |                    |                                                   |                    |
|-----------------|----------------------------------|--------------------|--------------------------------------|--------------------|----------------------------------------------|--------------------|---------------------------------------------------|--------------------|
|                 | (CH <sub>3</sub> ) $\alpha$ -TOH |                    | (CH <sub>3</sub> )- $\alpha$ TOH(Np) |                    | (CH <sub>3</sub> ) $\alpha$ -TO <sup>+</sup> |                    | (CH <sub>3</sub> )- $\alpha$ TO <sup>+</sup> (Np) |                    |
|                 | Gas                              | CH <sub>3</sub> CN | Gas                                  | CH <sub>3</sub> CN | Gas                                          | CH <sub>3</sub> CN | Gas                                               | CH <sub>3</sub> CN |
| H               | 0.411                            | 0.411              | 0.412                                | 0.412              | -                                            | -                  | -                                                 | -                  |
| O <sub>1</sub>  | -0.665                           | -0.666             | -0.665                               | -0.667             | -0.385                                       | -0.388             | -0.387                                            | -0.390             |
| O <sub>2</sub>  | -0.574                           | -0.576             | -0.578                               | -0.579             | -0.455                                       | -0.452             | -0.457                                            | -0.455             |
| C <sub>1</sub>  | 0.270                            | 0.272              | 0.275                                | 0.276              | 0.376                                        | 0.376              | 0.372                                             | 0.372              |
| C <sub>2</sub>  | 0.049                            | 0.049              | 0.041                                | 0.041              | 0.060                                        | 0.059              | 0.082                                             | 0.083              |
| C <sub>3</sub>  | 0.098                            | 0.099              | 0.102                                | 0.102              | 0.086                                        | 0.086              | 0.049                                             | 0.048              |
| C <sub>4</sub>  | 0.205                            | 0.205              | 0.206                                | 0.206              | 0.390                                        | 0.389              | 0.394                                             | 0.392              |
| C <sub>5</sub>  | 0.095                            | 0.095              | 0.084                                | 0.084              | 0.062                                        | 0.063              | 0.059                                             | 0.061              |
| C <sub>6</sub>  | 0.081                            | 0.080              | 0.075                                | 0.074              | 0.093                                        | 0.094              | 0.094                                             | 0.094              |
| C <sub>7</sub>  | -0.371                           | -0.372             | -0.362                               | -0.362             | -0.370                                       | -0.371             | -0.370                                            | -0.369             |
| C <sub>8</sub>  | -0.275                           | -0.275             | -0.278                               | -0.278             | -0.308                                       | -0.308             | -0.309                                            | -0.310             |
| C <sub>9</sub>  | 0.310                            | 0.309              | 0.313                                | 0.312              | 0.248                                        | 0.246              | 0.251                                             | 0.248              |
| C <sub>10</sub> | -0.532                           | -0.531             | -0.351                               | -0.352             | -0.522                                       | -0.521             | -0.359                                            | -0.360             |
| C <sub>11</sub> | -0.535                           | -0.536             | -0.591                               | -0.590             | -0.557                                       | -0.557             | -0.524                                            | -0.522             |
| C <sub>12</sub> | -0.592                           | -0.591             | -0.534                               | -0.534             | -0.551                                       | -0.550             | -0.550                                            | -0.551             |
| C <sub>13</sub> | -0.457                           | -0.457             | -0.460                               | -0.459             | -0.465                                       | -0.463             | -0.466                                            | -0.465             |
| C <sub>14</sub> | -0.456                           | -0.456             | -0.458                               | -0.459             | -0.463                                       | -0.461             | -0.463                                            | -0.460             |
| Residual Atoms  | 2.937                            | 2.941              | 2.766                                | 2.768              | 3.748                                        | 3.723              | 3.585                                             | 3.583              |
| Total           | -0.001                           | 0.001              | -0.003                               | -0.005             | 0.987                                        | 0.965              | 1.001                                             | 0.999              |

**Table S3.** Calculated (B3LYP/6-31G(d)) charges from natural bond orbital (NBO) analysis (gaseous and solution phase) for the  $\alpha$ -tocopherol model compound [(CH<sub>3</sub>) $\alpha$ -TOH] and its neopentyl derivative [(CH<sub>3</sub>)- $\alpha$ TOH(Np)] and their associated diamagnetic cationic forms, (CH<sub>3</sub>) $\alpha$ -TO<sup>+</sup> and (CH<sub>3</sub>)- $\alpha$ TO<sup>+</sup>(Np).

| Bond            | Charge                           |                    |                                      |                    |                                              |                    |                                                   |                    |
|-----------------|----------------------------------|--------------------|--------------------------------------|--------------------|----------------------------------------------|--------------------|---------------------------------------------------|--------------------|
|                 | (CH <sub>3</sub> ) $\alpha$ -TOH |                    | (CH <sub>3</sub> )- $\alpha$ TOH(Np) |                    | (CH <sub>3</sub> ) $\alpha$ -TO <sup>+</sup> |                    | (CH <sub>3</sub> )- $\alpha$ TO <sup>+</sup> (Np) |                    |
|                 | Gas                              | CH <sub>3</sub> CN | Gas                                  | CH <sub>3</sub> CN | Gas                                          | CH <sub>3</sub> CN | Gas                                               | CH <sub>3</sub> CN |
| H               | 0.411                            | 0.490              | 0.491                                | 0.491              | -                                            | -                  | -                                                 | -                  |
| O <sub>1</sub>  | -0.665                           | -0.707             | -0.707                               | -0.708             | -0.427                                       | -0.427             | -0.434                                            | -0.434             |
| O <sub>2</sub>  | -0.574                           | -0.563             | -0.563                               | -0.564             | -0.431                                       | -0.430             | -0.431                                            | -0.430             |
| C <sub>1</sub>  | 0.270                            | 0.304              | 0.311                                | 0.311              | 0.559                                        | 0.561              | 0.566                                             | 0.568              |
| C <sub>2</sub>  | 0.049                            | -0.049             | -0.057                               | -0.057             | -0.065                                       | -0.064             | -0.062                                            | -0.061             |
| C <sub>3</sub>  | 0.098                            | -0.062             | -0.086                               | -0.086             | 0.033                                        | 0.031              | 0.035                                             | 0.032              |
| C <sub>4</sub>  | 0.205                            | 0.321              | 0.319                                | 0.319              | 0.516                                        | 0.514              | 0.514                                             | 0.512              |
| C <sub>5</sub>  | 0.095                            | -0.090             | -0.058                               | -0.058             | 0.064                                        | 0.063              | 0.061                                             | 0.060              |
| C <sub>6</sub>  | 0.081                            | -0.088             | -0.086                               | -0.086             | -0.103                                       | -0.103             | -0.103                                            | -0.102             |
| C <sub>7</sub>  | -0.371                           | -0.472             | -0.470                               | -0.470             | -0.487                                       | -0.486             | -0.485                                            | -0.484             |
| C <sub>8</sub>  | -0.275                           | -0.474             | -0.475                               | -0.475             | -0.493                                       | -0.493             | -0.492                                            | -0.493             |
| C <sub>9</sub>  | 0.310                            | 0.287              | 0.289                                | 0.288              | 0.283                                        | 0.283              | 0.284                                             | 0.285              |
| C <sub>10</sub> | -0.532                           | -0.692             | -0.468                               | -0.468             | -0.706                                       | -0.706             | -0.484                                            | -0.484             |
| C <sub>11</sub> | -0.535                           | -0.693             | -0.707                               | -0.707             | -0.726                                       | -0.725             | -0.713                                            | -0.712             |
| C <sub>12</sub> | -0.592                           | -0.709             | -0.693                               | -0.693             | -0.727                                       | -0.726             | -0.727                                            | -0.726             |
| C <sub>13</sub> | -0.457                           | -0.696             | -0.696                               | -0.696             | -0.704                                       | -0.702             | -0.702                                            | -0.700             |
| C <sub>14</sub> | -0.456                           | -0.679             | -0.679                               | -0.679             | -0.697                                       | -0.696             | -0.696                                            | -0.695             |
| Residual Atoms  | 2.937                            | 4.571              | 4.328                                | 4.342              | 5.110                                        | 5.104              | 4.873                                             | 4.859              |
| Total           | -0.001                           | -0.001             | -0.007                               | 0.004              | 0.999                                        | 0.998              | 1.004                                             | 0.995              |



#### 4. Additional References

- S1.** Fujiwara, Y.; Domingo, V.; Seiple, I. B.; Gianatassio, R.; Bel, M. D., Baran, P. S. *J. Am. Chem. Soc.* **2010**, *133*, 3292–3295.
- S2.** Marchand, A. P.; Reddy G. M. *Synthesis* **1991**, 198–200.
- S3.** Yang, J.; Liu, G.-Y.; Lu, D.-L.; Dai, F.; Qian, Y.-P.; Jin, X.-L.; Zhou, B. *Chem. Eur. J.* **2010**, *16*, 12808–12813.
